# Supplementary material for: Which Probiotic Is the Most Effective for Treating Acute Diarrhea in Children? A Bayesian Network Meta-Analysis of Randomized Controlled Trials
Source: MDPI journal article supplement (doi:10.3390/nu13124319), 2021-11-29
Supplement: s1 [file s1]

## Supplementary Materials

### **Which Probiotic Is the Most Effective for Treating Acute Diarrhea in Children? A Bayesian Network Meta-Analysis of Randomized Controlled Trials**

Zengbin Li<sup>1</sup>, Guixian Zhu<sup>1</sup>, Chao Li<sup>2</sup>, Hao Lai<sup>1</sup>, Xin Liu<sup>2</sup>, Lei Zhang<sup>1,3,4,5,\*</sup>

<sup>1</sup> China-Australia Joint Research Center for Infectious Diseases, School of Public Health, Xi'an Jiaotong University Health Science Center, Xi'an, 710061, Shaanxi, People's Republic of China; lizengbin98@126.com (Z.L.); xianxianshell@163.com (G.Z.); xjtu\_haolai@163.com (H.L.)

<sup>2</sup> Department of Epidemiology and Biostatistics, School of Public Health, Global Health Institute, Xi'an Jiaotong University Health Science Center, Xi'an, 710061, Shaanxi, People's Republic of China; lcxjtu@xjtu.edu.cn (C.L.); xinliu@xjtu.edu.cn (X.L.)

<sup>3</sup> Melbourne Sexual Health Centre, Alfred Health, Melbourne, Australia.

<sup>4</sup> Central Clinical School, Faculty of Medicine, Nursing and Health Sciences, Monash University, Melbourne, Australia.

<sup>5</sup> Department of Epidemiology and Biostatistics, College of Public Health, Zhengzhou University, Zhengzhou, Henan, People's Republic of China.

\* Correspondence: lei.zhang1@monash.edu (L.Z.); Tel.: (+8629-82655135)

## Online Supplementary Contents

|                                                                                                 |    |
|-------------------------------------------------------------------------------------------------|----|
| Table S1. Search strategies.....                                                                | 1  |
| Table S2. Characteristics of included studies.....                                              | 2  |
| References .....                                                                                | 8  |
| Figure S1. Risk of bias graph .....                                                             | 12 |
| Figure S2. Risk of bias summary.....                                                            | 13 |
| Figure S3. Incoherence plot for the duration of diarrhea (control = placebo/no treatment) ..... | 14 |
| Figure S4. Incoherence plot for the duration of diarrhea (control = no treatment).....          | 15 |
| Figure S5. Incoherence plot for the duration of hospitalization .....                           | 16 |
| Figure S6. Incoherence plot for the mean stool frequency on day 2 .....                         | 16 |
| Figure S7. Incoherence plot for the duration of vomiting .....                                  | 17 |
| Figure S8. Incoherence plot for the duration of fever.....                                      | 17 |
| Table S3. Heterogeneity for the duration of diarrhea (control = placebo/no treatment).....      | 18 |
| Table S4. Heterogeneity for the duration of diarrhea (control = placebo).....                   | 19 |
| Table S5. Heterogeneity for the duration of diarrhea (control = no treatment) .....             | 20 |
| Table S6. Heterogeneity for diarrhea lasting $\geq 2$ days.....                                 | 21 |
| Table S7. Heterogeneity for the duration of hospitalization.....                                | 22 |
| Table S8. Heterogeneity for the mean stool frequency on day 2.....                              | 23 |
| Table S9. Heterogeneity for the duration of vomiting .....                                      | 24 |
| Table S10. Heterogeneity for the duration of fever .....                                        | 25 |
| Table S11. NMA results for the duration of diarrhea (control = placebo/no treatment).....       | 26 |
| Table S12. NMA results for the duration of diarrhea (control = placebo).....                    | 28 |
| Table S13. NMA results for the duration of diarrhea (control = no treatment) .....              | 30 |
| Table S14. NMA results for diarrhea lasting $\geq 2$ days .....                                 | 31 |
| Table S15. NMA results for the duration of hospitalization.....                                 | 32 |
| Table S16. NMA results for the mean stool frequency on day 2.....                               | 33 |
| Table S17. NMA results for the duration of vomiting .....                                       | 34 |
| Table S18. NMA results for the duration of fever .....                                          | 35 |
| Table S19. Certainty of evidence for the duration of diarrhea.....                              | 36 |
| Table S20. Certainty of evidence for the duration of diarrhea (control = placebo) .....         | 37 |
| Table S21. Certainty of evidence for the duration of diarrhea (control = no treatment).....     | 38 |
| Table S22. Certainty of evidence for diarrhea lasting $\geq 2$ days .....                       | 39 |
| Table S23. Certainty of evidence for the duration of hospitalization .....                      | 40 |
| Table S24. Certainty of evidence for the mean stool frequency on day 2 .....                    | 41 |
| Table S25. Certainty of evidence for the duration of vomiting .....                             | 42 |
| Table S26. Certainty of evidence for the duration of fever .....                                | 43 |
| Table S27. Rank for outcomes .....                                                              | 44 |

**Table S1.** Search strategies

We searched Embase, PubMed, and the Cochrane Library using a combination of MeSH and free text. Besides, we chose the title/abstract to limit the scope. The search terms include: “diarrhea”, “probiotic”, “children”, and “randomized controlled trial”. In order to include relevant literatures that meet the inclusion criteria as much as possible, we did not add “randomized controlled trial” to search in the Cochrane Library.

|                                                     |                                                                                                                                                                                                                                                                                                                                                                                                                                                                                                                                                                                                                                                                                                                                                                                                                                                                                                                                                                                                                                                                                      |
|-----------------------------------------------------|--------------------------------------------------------------------------------------------------------------------------------------------------------------------------------------------------------------------------------------------------------------------------------------------------------------------------------------------------------------------------------------------------------------------------------------------------------------------------------------------------------------------------------------------------------------------------------------------------------------------------------------------------------------------------------------------------------------------------------------------------------------------------------------------------------------------------------------------------------------------------------------------------------------------------------------------------------------------------------------------------------------------------------------------------------------------------------------|
| Search terms related to diarrhea                    | Diarrhea; diarrheas; diarrheae; diarrheas; acute diarrhea; diarrh*; gastroenteritis; gastroenteritides; acute gastroenteritis                                                                                                                                                                                                                                                                                                                                                                                                                                                                                                                                                                                                                                                                                                                                                                                                                                                                                                                                                        |
| Search terms related to probiotic                   | Probiotic; probiotics; probiotic*; prebiotics; prebiotic; prebiotic*; <i>bifidobacterial</i> ; <i>bifidobacterium</i> ; <i>lactobacillaceae</i> ; <i>lactobacilli</i> ; <i>lactobacillus</i> ; <i>saccharomyces</i> ; <i>saccharomyces</i> ; <i>saccharomyc</i> *; <i>saccharomyces boulardii</i> ; <i>lactobacillus</i> ; <i>enterococcus</i> ; <i>escherichia coli</i> ; <i>streptococcus</i> ; <i>lactococcus</i> ; <i>bacillus</i> ; <i>lactobacilli</i> ; <i>lactobacillus rhamnosus GG</i> ; <i>lactobacillus reuteri</i> ; <i>lactobacillus sporogenes</i> ; <i>bifidobacterium longum</i> ; <i>bifidobacterium breve</i> ; <i>bifidobacterium bifidum</i> ; <i>bifidobacterium lactis</i> ; <i>bacillus</i> ; <i>bacillus clausii</i> ; <i>lactobacill</i> *; <i>streptococcus thermophilus</i> ; <i>streptococc</i> *; <i>lactococc</i> *; <i>bacillus subtilis</i> ; <i>enterococcus</i> ; <i>enterococcus faec</i> *; <i>leuconostoc</i> ; <i>pediococc</i> *; <i>bulgarian bacillus</i> ; <i>bacillus laterosporus</i> ; <i>pediococcus acidilactici</i> ; <i>lactis</i> |
| Search terms related to children                    | Children; child; child*; kids; kid; neonat; neonat*; baby; babies; pediatric; paediatric; infant; infants; toddler*; toddler; toddlers; adolescent; adolescents; adolescence; adolescen*; newborns; adolescen*; teenag*; youth*; young; preschooler; preschoolers; juvenile; juvenile*; pubescent; youth; teen; teens; teenage; teen-age; teenaged; teen-aged; teenager; teenagers; teen-ager; teen-agers; youngster; youngsters; minor; minors; infan*; newborn*; new-born*; infant, newborn; infants, newborn; newborn infant; newborn infants; newborns; newborn; neonate; neonates; infantile                                                                                                                                                                                                                                                                                                                                                                                                                                                                                    |
| Search terms related to randomized controlled trial | Randomized; random; randomly; random*; randomized controlled trial; clinical trials, randomized; trials, randomized clinical; controlled clinical trial; placebo; placebo*; trial; groupscrossover procedure; double-blind procedure; single-blind procedure; groups; assign*; allocat*; single blind; double blind; triple blind                                                                                                                                                                                                                                                                                                                                                                                                                                                                                                                                                                                                                                                                                                                                                    |

**Table S2.** Characteristics of included studies

| Study               | Study Site | Intervention                                                                                                 | N  | Duration of hospitalization(day) | Duration of Diarrhea(day) | Duration of Fever(day) | Duration of Vomiting(day) | Day 2 Stool Frequency | Diarrhea lasting $\geq 2$ days(N) |
|---------------------|------------|--------------------------------------------------------------------------------------------------------------|----|----------------------------------|---------------------------|------------------------|---------------------------|-----------------------|-----------------------------------|
| Vaghela 2020 [1]    | India      | <i>S. boulardii</i>                                                                                          | 50 | NA                               | NA                        | NA                     | NA                        | NA                    | 44                                |
|                     |            | No treatment                                                                                                 | 50 | NA                               | NA                        | NA                     | NA                        | NA                    | 49                                |
| Shin 2020 [2]       | Korea      | <i>L. plantarum</i>                                                                                          | 15 | 4.17 $\pm$ 0.86                  | 1.0 $\pm$ 0.57            | 1.27 $\pm$ 1.64        | 0.64 $\pm$ 0.82           | NA                    | NA                                |
|                     |            | No treatment                                                                                                 | 8  | 3.94 $\pm$ 0.61                  | 2.23 $\pm$ 0.35           | 1.50 $\pm$ 2.23        | 0.72 $\pm$ 0.67           | NA                    | NA                                |
| Mourey 2020 [3]     | India      | <i>S. boulardii</i>                                                                                          | 49 | NA                               | 2.74 $\pm$ 0.5            | NA                     | NA                        | 3.1 $\pm$ 0.9         | 8                                 |
|                     |            | Placebo                                                                                                      | 51 | NA                               | 3.97 $\pm$ 0.73           | NA                     | NA                        | 3.6 $\pm$ 1.3         | 36                                |
| Kluijfhout 2020 [4] | Belgium    | <i>S. thermophilus</i> + <i>L. rhamnosus</i> + <i>L. acidophilus</i> + <i>B. lactis</i> + <i>B. infantis</i> | 26 | NA                               | 3.04 $\pm$ 1.36           | NA                     | NA                        | NA                    | 15                                |
|                     |            | Placebo                                                                                                      | 20 | NA                               | 4.2 $\pm$ 1.34            | NA                     | NA                        | NA                    | 17                                |
| Chen 2020 [5]       | China      | <i>B. lactis</i> + <i>L. rhamnosus</i> + <i>L. acidophilus</i>                                               | 96 | 5.1 $\pm$ 1.2                    | 5.06 $\pm$ 0.57           | NA                     | NA                        | 4.4 $\pm$ 1.3         | NA                                |
|                     |            | No treatment                                                                                                 | 98 | 6.3 $\pm$ 1.4                    | 6.0 $\pm$ 0.83            | NA                     | NA                        | 4.7 $\pm$ 1.9         | NA                                |
| Szymanski 2019 [6]  | Poland     | <i>L. reuteri</i>                                                                                            | 44 | 2.56 $\pm$ 0.90                  | 2.45 $\pm$ 1.83           | NA                     | NA                        | 2.40 $\pm$ 3.30       | 4                                 |
|                     |            | Placebo                                                                                                      | 44 | 2.81 $\pm$ 1.16                  | 2.79 $\pm$ 2.39           | NA                     | NA                        | 2.35 $\pm$ 3.82       | 2                                 |
| Sudha 2019          | India      | <i>Bacillus clausii</i>                                                                                      | 59 | NA                               | 3.14 $\pm$ 0.54           | 1.57 $\pm$ 0.51        | NA                        | 6.84 $\pm$ 1.76       | 54                                |

|                      |             |                                            |     |           |           |           |    |           |     |
|----------------------|-------------|--------------------------------------------|-----|-----------|-----------|-----------|----|-----------|-----|
| [7]                  |             | Placebo                                    | 60  | NA        | 3.4±0.64  | 1.60±0.58 | NA | 7.38±1.94 | 58  |
| Islam 2019 [8]       | Bangladesh  | <i>Bacillus clausii</i>                    | 160 | 3.8±1.4   | 3.2±1.3   | NA        | NA | 5.8±2.0   | NA  |
|                      |             | No treatment                               | 150 | 3.8±1.0   | 3.3±1.1   | NA        | NA | 6.0±1.7   | NA  |
| Vidjeadevan 2018 [9] | India       | <i>S. boulardii</i>                        | 34  | 3.41±1.04 | 3.36±0.77 | NA        | NA | NA        | NA  |
|                      |             | <i>Bacillus clausii</i>                    | 33  | 3.06±0.86 | 3.64±0.78 | NA        | NA | NA        | NA  |
|                      |             | No treatment                               | 32  | 3.34±1.06 | 4.50±0.78 | NA        | NA | NA        | NA  |
| Schnadower 2018 [10] | USA         | LGG                                        | 468 | NA        | 2.53±2.45 | NA        | NA | 2.46±2.81 | 243 |
|                      |             | Placebo                                    | 475 | NA        | 2.65±2.32 | NA        | NA | 2.57±2.61 | 251 |
| Javeed 2018 [11]     | Pakistan    | <i>S. boulardii</i>                        | 157 | NA        | 4.37±1.38 | NA        | NA | NA        | 157 |
|                      |             | Placebo                                    | 157 | NA        | 4.59±1.50 | NA        | NA | NA        | 157 |
| Hong Chau 2018 [12]  | Vietnam     | <i>L. acidophilus</i>                      | 150 | 3.29±1.56 | 3.36±1.78 | NA        | NA | NA        | 54  |
|                      |             | Placebo                                    | 150 | 3.26±1.59 | 3.33±1.72 | NA        | NA | NA        | 60  |
| Freedman 2018 [13]   | Multicenter | <i>L. rhamnosus</i> + <i>L. helveticus</i> | 414 | NA        | 2.81±2.75 | NA        | NA | 2.46±0.14 | 228 |
|                      |             | Placebo                                    | 413 | NA        | 3.0±2.92  | NA        | NA | 2.81±0.19 | 225 |
| Bhat 2018 [14]       | India       | <i>Bacillus clausii</i>                    | 40  | 3.26±0.69 | 2.22±0.70 | 0.51±0.34 | NA | 3.98±1.40 | NA  |
|                      |             | <i>S. boulardii</i>                        | 40  | 2.72±0.42 | 1.74±0.45 | 0.44±0.30 | NA | 4.48±1.77 | NA  |
|                      |             | No treatment                               | 40  | 3.37±1.10 | 2.40±1.10 | 0.97±0.96 | NA | 4.18±2.63 | NA  |
| Sirsat 2017 [15]     | India       | <i>S. boulardii</i>                        | 145 | NA        | NA        | NA        | NA | NA        | 82  |
|                      |             | No treatment                               | 145 | NA        | NA        | NA        | NA | NA        | 54  |

|                        |             |                                                                                                                                                      |     |           |           |           |           |         |    |
|------------------------|-------------|------------------------------------------------------------------------------------------------------------------------------------------------------|-----|-----------|-----------|-----------|-----------|---------|----|
| Park 2017 [16]         | Korea       | <i>L. acidophilus</i> + <i>B. longum</i>                                                                                                             | 28  | NA        | 4.38±1.29 | 3.66±1.14 | NA        | NA      | NA |
|                        |             | Placebo                                                                                                                                              | 29  | NA        | 5.61±1.23 | 4.32±1.94 | NA        | NA      | NA |
| Burki 2017 [17]        | Pakistan    | <i>S. boulardii</i>                                                                                                                                  | 100 | NA        | 3.23±1.31 | NA        | NA        | NA      | 60 |
|                        |             | No treatment                                                                                                                                         | 100 | NA        | 5.84±1.81 | NA        | NA        | NA      | 80 |
| Yazar 2016 [18]        | Turkey      | <i>L. casei</i> + <i>L. rhamnosus</i> + <i>L. plantarum</i> + <i>B. lactis</i>                                                                       | 55  | NA        | 3.79±1.20 | NA        | NA        | NA      | 34 |
|                        |             | No treatment                                                                                                                                         | 55  | NA        | 4.76±1.29 | NA        | NA        | NA      | 46 |
| Sharif 2016 [19]       | Iran        | <i>S. boulardii</i>                                                                                                                                  | 100 | NA        | 3.4±1.3   | NA        | NA        | 6.5±1.8 | NA |
|                        |             | Placebo                                                                                                                                              | 100 | NA        | 5.5±2.1   | NA        | NA        | 7.2±3.5 | NA |
| Garcia-Menor 2016 [20] | Multicenter | <i>L. casei</i> + <i>L. rhamnosus</i> + <i>S. thermophilus</i> + <i>B. breve</i> + <i>L. acidophilus</i> + <i>B. infantis</i> + <i>B. bulgaricus</i> | 43  | NA        | 3.35±2.30 | NA        | NA        | NA      | 19 |
|                        |             | No treatment                                                                                                                                         | 42  | NA        | 4.0±1.54  | NA        | NA        | NA      | 20 |
| Dash 2016 [21]         | India       | <i>S. boulardii</i>                                                                                                                                  | 64  | NA        | 1.1±2.0   | NA        | NA        | NA      | NA |
|                        |             | No treatment                                                                                                                                         | 62  | NA        | 2.03±2.0  | NA        | NA        | NA      | NA |
| Das 2016 [22]          | India       | <i>S. boulardii</i>                                                                                                                                  | 30  | 3.17±0.84 | 2.50±0.20 | 2.38±0.62 | 1.99±0.55 | NA      | NA |
|                        |             | Placebo                                                                                                                                              | 28  | 3.78±0.94 | 3.72±0.20 | 2.82±0.85 | 2.20±0.59 | NA      | NA |
| Lee 2015 [23]          | Korea       | <i>B. longum</i> + <i>B. lactis</i> + <i>L. acidophilus</i> + <i>L. rhamnosus</i> + <i>L. plantarum</i> + <i>Pediococcus pentosaceus</i>             | 13  | NA        | 6.1±0.5   | 1.1±1.9   | 1.6±1.6   | NA      | NA |

|                          |           |                                                                                                  |     |           |           |           |           |           |     |
|--------------------------|-----------|--------------------------------------------------------------------------------------------------|-----|-----------|-----------|-----------|-----------|-----------|-----|
|                          |           | Placebo                                                                                          | 16  | NA        | 7.2±1.9   | 1.6±1.7   | 2.8±1.8   | NA        | NA  |
| Hegar 2015<br>[24]       | Indonesia | <i>L. rhamnosus</i> + <i>L. acidophilus</i>                                                      | 56  | NA        | 2.99±1.38 | NA        | NA        | NA        | NA  |
|                          |           | Placebo                                                                                          | 56  | NA        | 2.78±1.32 | NA        | NA        | NA        | NA  |
| Freedman<br>2015 [25]    | Canada    | <i>L. helveticus</i> + <i>L. rhamnosus</i>                                                       | 61  | NA        | 2.96±3.26 | NA        | 1.51±1.93 | NA        | NA  |
|                          |           | Placebo                                                                                          | 62  | NA        | 2.65±2.68 | NA        | 1.57±1.80 | NA        | NA  |
| El-Soud 2015<br>[26]     | Egypt     | <i>B. lactis</i>                                                                                 | 25  | NA        | 3.12±0.92 | 2.27±0.85 | NA        | NA        | NA  |
|                          |           | Placebo                                                                                          | 25  | NA        | 4.10±0.94 | 2.79±0.64 | NA        | NA        | NA  |
| Dinleyici<br>2015-1 [27] | Turkey    | <i>S. boulardii</i>                                                                              | 220 | 4.60±1.72 | 3.14±1.38 | NA        | NA        | NA        | 141 |
|                          |           | No treatment                                                                                     | 143 | 6.12±1.71 | 4.16±1.35 | NA        | NA        | NA        | 120 |
| Dinleyici<br>2015-2 [28] | Turkey    | <i>L. reuteri</i>                                                                                | 29  | NA        | 2.52±1.02 | NA        | NA        | NA        | 13  |
|                          |           | No treatment                                                                                     | 31  | NA        | 3.10±0.64 | NA        | NA        | NA        | 27  |
| Sindhu 2014<br>[29]      | India     | LGG                                                                                              | 65  | NA        | 4.35±2.27 | NA        | NA        | NA        | NA  |
|                          |           | Placebo                                                                                          | 59  | NA        | 4.35±2.28 | NA        | NA        | NA        | NA  |
| Dinleyici 2014<br>[30]   | Turkey    | <i>L. reuteri</i>                                                                                | 64  | 4.31±1.30 | 2.95±1.09 | NA        | NA        | NA        | 32  |
|                          |           | No treatment                                                                                     | 63  | 5.46±1.77 | 4.33±1.18 | NA        | NA        | NA        | 60  |
| Huang 2014<br>[31]       | China     | <i>Bacillus mesentericus</i> +<br><i>Clostridium butyricum</i> +<br><i>Enterococcus faecalis</i> | 82  | 5.7±2.4   | 1.8±1.6   | 2.2±1.5   | NA        | NA        | NA  |
|                          |           | No treatment                                                                                     | 77  | 5.2±2.3   | 2.9±1.4   | 2.0±1.5   | NA        | NA        | NA  |
| Azim 2014                | Pakistan  | <i>S. boulardii</i>                                                                              | 45  | 3.09±0.46 | NA        | NA        | NA        | 3.56±0.84 | NA  |

|                       |          |                                                                                                                  |     |           |           |    |           |             |     |
|-----------------------|----------|------------------------------------------------------------------------------------------------------------------|-----|-----------|-----------|----|-----------|-------------|-----|
| [32]                  |          | No treatment                                                                                                     | 45  | 5.07±0.93 | NA        | NA | NA        | 5.31±0.73   | NA  |
| Aggarwal 2014 [33]    | India    | LGG                                                                                                              | 100 | 3.33±0.56 | 2.59±0.56 | NA | 0.62±0.48 | NA          | NA  |
|                       |          | No treatment                                                                                                     | 100 | 3.84±0.65 | 3.34±0.56 | NA | 0.81±0.43 | NA          | NA  |
| Phavichitr 2013 [34]  | Thailand | <i>L. acidophilus</i> + <i>B. bifidum</i>                                                                        | 53  | 2.35±0.76 | 4.35±2.29 | NA | NA        | NA          | NA  |
|                       |          | Placebo                                                                                                          | 53  | 3.0±1.52  | 5.0±1.52  | NA | NA        | NA          | NA  |
| Dinleyici 2013 [35]   | Turkey   | <i>L. acidophilus</i> + <i>L. rhamnosus</i> + <i>B. bifidum</i> , <i>B. longum</i> + <i>Enterococcus faecium</i> | 113 | 4.94±1.70 | 3.25±1.27 | NA | NA        | 3.38 ±1.6   | 82  |
|                       |          | No treatment                                                                                                     | 96  | 5.77±1.97 | 4.78±1.56 | NA | NA        | 4.65±3.61   | 90  |
| Burande 2013 [36]     | India    | <i>S. boulardii</i>                                                                                              | 35  | NA        | 3.4±1.4   | NA | NA        | NA          | NA  |
|                       |          | No treatment                                                                                                     | 35  | NA        | 5.5±2.1   | NA | NA        | NA          | NA  |
| Riaz 2012 [37]        | India    | <i>S. boulardii</i>                                                                                              | 43  | NA        | 2.06±0.99 | NA | NA        | 10.96±8.04  | NA  |
|                       |          | Placebo                                                                                                          | 47  | NA        | 2.76±1.22 | NA | NA        | 16.21±17.39 | NA  |
| Nixon 2012 [38]       | USA      | LGG                                                                                                              | 63  | NA        | 2.82±1.50 | NA | NA        | NA          | NA  |
|                       |          | Placebo                                                                                                          | 66  | NA        | 3.08±1.65 | NA | NA        | NA          | NA  |
| Khan 2012 [39]        | Pakistan | <i>S. boulardii</i>                                                                                              | 210 | NA        | 3.43±5.58 | NA | NA        | NA          | 11  |
|                       |          | No treatment                                                                                                     | 210 | NA        | 4.50±5.58 | NA | NA        | NA          | 120 |
| Francavilla 2012 [40] | Italy    | <i>L. reuteri</i>                                                                                                | 35  | NA        | 2.1±1.7   | NA | NA        | 4.3±1.7     | 16  |
|                       |          | Placebo                                                                                                          | 34  | NA        | 3.3±2.1   | NA | NA        | 6.3±2.1     | 25  |
| Erdogan 2012          | Turkey   | <i>S. boulardii</i>                                                                                              | 25  | NA        | 6.6±1.7   | NA | NA        | NA          | NA  |



|                          |           |                                                                                                              |     |           |           |           |           |           |    |
|--------------------------|-----------|--------------------------------------------------------------------------------------------------------------|-----|-----------|-----------|-----------|-----------|-----------|----|
| [41]                     |           | <i>B. lactis</i>                                                                                             | 25  | NA        | 4.1±1.3   | NA        | NA        | NA        | NA |
|                          |           | No treatment                                                                                                 | 25  | NA        | 7.0±1.6   | NA        | NA        | NA        | NA |
| Vandenplas 2011 [42]     | Belgium   | <i>S. thermophilus</i> + <i>L. rhamnosus</i> + <i>L. acidophilus</i> + <i>B. lactis</i> + <i>B. infantis</i> | 57  | NA        | 3.05±1.28 | NA        | NA        | 3.14±1.52 | 25 |
|                          |           | Placebo                                                                                                      | 54  | NA        | 4.31±0.83 | NA        | NA        | 3.69±1.99 | 40 |
| Dutta 2011 [43]          | India     | <i>L. sporogenes</i>                                                                                         | 78  | NA        | 1.42±0.85 | NA        | NA        | NA        | NA |
|                          |           | Placebo                                                                                                      | 70  | NA        | 1.52±0.89 | NA        | NA        | NA        | NA |
| Dalgic 2011 [44]         | Turkey    | <i>S. boulardii</i>                                                                                          | 60  | 5.30±1.73 | 4.78±1.46 | NA        | 0.85±0.54 | NA        | NA |
|                          |           | Placebo                                                                                                      | 60  | 5.81±2.08 | 5.35±1.80 | NA        | 0.68±0.47 | NA        |    |
| Correa 2011 [45]         | Brazil    | <i>S. boulardii</i>                                                                                          | 90  | NA        | NA        | NA        | NA        | NA        | 39 |
|                          |           | Placebo                                                                                                      | 86  | NA        | NA        | NA        | NA        | NA        | 69 |
| Ritchie 2010 [46]        | Australia | LGG                                                                                                          | 33  | NA        | 2.18±2.08 | NA        | NA        | 3.30±2.54 | 13 |
|                          |           | Placebo                                                                                                      | 31  | NA        | 2.13±1.77 | NA        | NA        | 4.70±2.59 | 12 |
| Rerksupphaphol 2010 [47] | Thailand  | <i>L. acidophilus</i> + <i>B. bifidum</i>                                                                    | 23  | NA        | NA        | NA        | NA        | NA        | 4  |
|                          |           | Placebo                                                                                                      | 22  | NA        | NA        | NA        | NA        | NA        | 11 |
| Grandy 2010 [48]         | Bolivia   | <i>S. boulardii</i>                                                                                          | 21  | NA        | 2.92±1.21 | NA        | NA        | NA        | NA |
|                          |           | <i>L. acidophilus</i> + <i>L. rhamnosus</i> + <i>B. longum</i> + <i>S. boulardii</i>                         | 23  | NA        | 2.50±1.23 | NA        | NA        | NA        | NA |
|                          |           | Placebo                                                                                                      | 20  | NA        | 5.68±1.76 | NA        | NA        | NA        | NA |
| Chen 2010                | China     | <i>Bacillus mesentericus</i> +                                                                               | 150 | 2.9±0.8   | 2.50±1.32 | 1.73±0.98 | 1.18±0.88 | 2.72±1.25 | NA |

|                          |           |                                                                                         |     |           |           |           |           |            |    |
|--------------------------|-----------|-----------------------------------------------------------------------------------------|-----|-----------|-----------|-----------|-----------|------------|----|
| [49]                     |           | <i>Enterococcus faecalis</i> +<br><i>Clostridium butyricum</i>                          |     |           |           |           |           |            |    |
|                          |           | Placebo                                                                                 | 143 | 4.2±2.1   | 3.60±1.57 | 2.08±1.45 | 1.81±1.36 | 4.37±2.83  | NA |
| Misra 2009<br>[50]       | India     | LGG                                                                                     | 105 | NA        | 2.94±0.98 | NA        | NA        | NA         | NA |
|                          |           | Placebo                                                                                 | 105 | NA        | 3.25±1.43 | NA        | NA        | NA         | NA |
| Teran 2009<br>[51]       | Bolivia   | <i>L. acidophilus</i> + <i>L. rhamnosus</i><br>+ <i>B. longum</i> + <i>S. boulardii</i> | 25  | 3.46±1.40 | 2.38±1.06 | 1.0±1.13  | NA        | 6.79±7.08  | 7  |
|                          |           | No treatment                                                                            | 25  | 4.20±1.14 | 3.11±1.11 | 1.0±0.83  | NA        | 7.36±4.72  | 16 |
| Kianifar 2009<br>[52]    | Iran      | <i>L. acidophilus</i> + <i>B. bifidum</i>                                               | 32  | 2.1±0.7   | 3.4±0.8   | NA        | NA        | NA         | NA |
|                          |           | Placebo                                                                                 | 30  | 2.7±0.6   | 4.5±0.8   | NA        | NA        | NA         | NA |
| Basu 2009<br>[53]        | India     | LGG                                                                                     | 374 | 6.22±1.16 | 5.07±1.24 | NA        | 4.12±1.47 | 22.99±6.09 | NA |
|                          |           | No treatment                                                                            | 185 | 9.75±2.06 | 7.23±1.27 | NA        | 4.18±1.58 | 23.49±6.10 | NA |
| Rafeey 2008<br>[54]      | Iran      | <i>L. acidophilus</i>                                                                   | 40  | 3.4±0.9   | NA        | NA        | NA        | 4.0±3.2    | NA |
|                          |           | Placebo                                                                                 | 40  | 4.0±1.1   | NA        | NA        | NA        | 4.0±3.6    | NA |
| Narayanappa<br>2008 [55] | India     | <i>Bifilac</i>                                                                          | 40  | NA        | 4.35±1.25 | NA        | NA        | 3.98±2.71  | NA |
|                          |           | Placebo                                                                                 | 40  | NA        | 5.45±1.69 | NA        | NA        | 4.83±2.77  | NA |
| Mao 2008 [56]            | China     | <i>B. lactis</i> + <i>S. thermophilus</i>                                               | 141 | NA        | 2.79±0.15 | NA        | NA        | NA         | NA |
|                          |           | Placebo                                                                                 | 71  | NA        | 2.83±0.17 | NA        | NA        | NA         | NA |
| Villarruel<br>2007 [57]  | Argentina | <i>S. boulardii</i>                                                                     | 44  | NA        | 4.70±1.94 | NA        | NA        | NA         | NA |
|                          |           | Placebo                                                                                 | 44  | NA        | 6.16±3.20 | NA        | NA        | NA         | NA |

|                         |             |                                                                                              |     |         |           |           |           |           |    |
|-------------------------|-------------|----------------------------------------------------------------------------------------------|-----|---------|-----------|-----------|-----------|-----------|----|
| Ozkan 2007<br>[58]      | Turkey      | <i>S. boulardii</i>                                                                          | 16  | NA      | NA        | NA        | NA        | 3.06±0.33 | NA |
|                         |             | Placebo                                                                                      | 11  | NA      | NA        | NA        | NA        | 4.27±0.38 | NA |
| Canani 2007<br>[59]     | Italy       | LGG                                                                                          | 100 | NA      | 3.33±1.50 | 1.36±0.78 | 1.36±0.78 | 4.70±1.50 | NA |
|                         |             | <i>S. boulardii</i>                                                                          | 91  | NA      | 4.38±0.45 | 1.89±0.23 | 1.64±0.79 | 5.35±2.26 | NA |
|                         |             | <i>Bacillus clausii</i>                                                                      | 100 | NA      | 4.7±1.0   | 2.0±1.56  | 1.50±0.78 | 5.35±2.26 | NA |
|                         |             | <i>L. bulgaricus</i> + <i>L. acidophilus</i><br>+ <i>S. thermophilus</i> + <i>B. bifidum</i> | 97  | NA      | 3.06±1.63 | 1.701.56± | 1.36±0.77 | 4.70±1.51 | NA |
|                         |             | <i>Enterococcus faecium</i>                                                                  | 91  | NA      | 4.84±1.73 | 2.0±1.54  | 1.50±0.77 | 5.35±2.26 | NA |
|                         |             | No treatment                                                                                 | 92  | NA      | 4.7±1.0   | 1.64±0.78 | 1.64±0.77 | 5.35±2.26 | NA |
| Henker 2007<br>[60]     | Multicenter | <i>Escherichia coli</i> Nissle 1917                                                          | 55  | NA      | 2.93±0.98 | NA        | NA        | NA        | 21 |
|                         |             | Placebo                                                                                      | 58  | NA      | 4.37±0.38 | NA        | NA        | NA        | 32 |
| Basu 2007<br>[61]       | India       | LGG                                                                                          | 323 | 9.3±1.3 | 6.8±2.1   | NA        | 3.2±1.1   | 24.3±4.8  | NA |
|                         |             | Placebo                                                                                      | 323 | 9.2±1.2 | 6.6±2.3   | NA        | 3.3±1.2   | 24.2±5.3  | NA |
| Vivatvakin<br>2006 [62] | Thailand    | <i>L. acidophilus</i> + <i>B. infantis</i>                                                   | 35  | 2.1±1.2 | 1.6±0.7   | NA        | NA        | 2.2±2.0   | 2  |
|                         |             | No treatment                                                                                 | 36  | 1.6±1.0 | 2.9±1.7   | NA        | NA        | 2.6±2.2   | 11 |
| Szymanski<br>2006 [63]  | Poland      | Three <i>L. rhamnosus</i>                                                                    | 46  | NA      | 3.48±2.32 | NA        | NA        | 3.0±2.8   | NA |
|                         |             | Placebo                                                                                      | 41  | NA      | 4.0±2.98  | NA        | NA        | 2.9±2.9   | NA |
| Biloo 2006<br>[64]      | Parkistan   | <i>S. boulardii</i>                                                                          | 50  | NA      | 3.60±1.77 | NA        | NA        | NA        | NA |
|                         |             | No treatment                                                                                 | 50  | NA      | 4.80±1.77 | NA        | NA        | NA        | NA |

|                            |            |                                                                  |     |           |           |         |         |           |    |
|----------------------------|------------|------------------------------------------------------------------|-----|-----------|-----------|---------|---------|-----------|----|
| Sarker 2005 [65]           | Bangladesh | <i>L. paracasei</i>                                              | 115 | NA        | 3.77±1.88 | NA      | NA      | NA        | NA |
|                            |            | Placebo                                                          | 115 | NA        | 3.93±1.80 | NA      | NA      | NA        | NA |
| Kurugol 2005 [66]          | Turkey     | <i>S. boulardii</i>                                              | 100 | 2.9±1.2   | 4.7±2.5   | 1.0±0.8 | 1.2±1.0 | NA        | 20 |
|                            |            | Placebo                                                          | 100 | 3.9±1.5   | 5.5±3.2   | 1.1±0.9 | 1.3±1.0 | NA        | 55 |
| Kowalska-Duplaga 2004 [67] | Poland     | <i>L. acidophilus</i> + <i>B. bifidum</i> + <i>L. bulgaricus</i> | 86  | 4.71±1.38 | 2.28±1.25 | NA      | NA      | NA        | NA |
|                            |            | Placebo                                                          | 87  | 5.0±2.38  | 2.57±1.42 | NA      | NA      | NA        | NA |
| Costa-Ribeiro 2003 [68]    | Brazil     | LGG                                                              | 61  | NA        | 1.59±0.16 | NA      | NA      | NA        | 31 |
|                            |            | Placebo                                                          | 63  | NA        | 1.63±0.19 | NA      | NA      | NA        | 45 |
| Rosenfeldt 2002-1 [69]     | Denmark    | <i>L. rhamnosus</i> + <i>L. reuteri</i>                          | 24  | NA        | 3.16±1.65 | NA      | NA      | NA        | NA |
|                            |            | Placebo                                                          | 19  | NA        | 4.82±3.54 | NA      | NA      | NA        | NA |
| Rosenfeldt 2002-2 [70]     | Denmark    | <i>L. rhamnosus</i> + <i>L. reuteri</i>                          | 30  | 1.6±1.0   | 3.40±1.55 | 1.9±1.7 | 1.2±1.2 | NA        | NA |
|                            |            | Placebo                                                          | 39  | 2.7±2.0   | 4.21±1.98 | 2.1±2   | 1.6±1.4 | NA        | NA |
| Hafeez 2002 [71]           | Pakistan   | <i>S. boulardii</i>                                              | 51  | NA        | 3.60±1.49 | NA      | NA      | NA        | NA |
|                            |            | No treatment                                                     | 50  | NA        | 4.50±1.49 | NA      | NA      | NA        | NA |
| Urganci 2001 [72]          | Turkey     | <i>S. boulardii</i>                                              | 50  | NA        | NA        | NA      | NA      | 3.78±0.71 | 28 |
|                            |            | No treatment                                                     | 50  | NA        | NA        | NA      | NA      | 4.24±0.99 | 42 |
| Lee 2001 [73]              | China      | <i>L. acidophilus</i> + <i>B. infantis</i>                       | 50  | NA        | 3.1±0.7   | NA      | NA      | 1.9±1.9   | NA |
|                            |            | No treatment                                                     | 50  | NA        | 3.6±0.8   | NA      | NA      | 3.7±2.4   | NA |
| Boudraa 2001               | Algeria    | <i>L. bulgaricus</i> + <i>S.</i>                                 | 56  | NA        | 1.84±1.40 | NA      | NA      | NA        | 9  |

|                        |             |                     |     |           |           |    |    |         |    |
|------------------------|-------------|---------------------|-----|-----------|-----------|----|----|---------|----|
| [74]                   |             | <i>thermophilus</i> |     |           |           |    |    |         |    |
|                        |             | Placebo             | 56  | NA        | 2.57±1.48 | NA | NA | NA      | 23 |
| Guandalini 2000 [75]   | Multicenter | LGG                 | 147 | 3.28±0.93 | 2.43±1.15 | NA | NA | NA      | 78 |
|                        |             | Placebo             | 140 | 4.01±0.89 | 3.0±1.49  | NA | NA | NA      | 90 |
| Hernandez 1998 [76]    | Mexico      | <i>S. boulardii</i> | 25  | NA        | NA        | NA | NA | NA      | 5  |
|                        |             | Placebo             | 25  | NA        | NA        | NA | NA | NA      | 11 |
| Shornikova 1997-1 [77] | Russia      | LGG                 | 59  | 7.6±5.6   | 2.7±2.2   | NA | NA | NA      | NA |
|                        |             | Placebo             | 64  | 9.2±6.3   | 3.7±2.8   | NA | NA | NA      | NA |
| Shornikova 1997-2 [78] | Finland     | <i>L. reuteri</i>   | 41  | NA        | 1.70±1.02 | NA | NA | 1.9±2.4 | 11 |
|                        |             | Placebo             | 25  | NA        | 2.5±1.5   | NA | NA | 3.8±2.8 | 11 |
| Shornikova 1997-3 [79] | Finland     | <i>L. reuteri</i>   | 19  | NA        | 1.7±1.6   | NA | NA | 1.0±2.3 | 3  |
|                        |             | Placebo             | 21  | NA        | 2.9±2.3   | NA | NA | 2.5±2.3 | 11 |
| Guarino 1997 [80]      | Italy       | LGG                 | 52  | NA        | 3.20±1.44 | NA | NA | NA      | NA |
|                        |             | Placebo             | 48  | NA        | 5.90±1.39 | NA | NA | NA      | NA |
| Pant 1996 [81]         | Thailand    | LGG                 | 14  | NA        | 1.9±0.6   | NA | NA | 3.5±1.3 | NA |
|                        |             | Placebo             | 12  | NA        | 3.3±2.3   | NA | NA | 5.2±2.8 | NA |
| Raza 1995 [82]         | Pakistan    | LGG                 | 19  | NA        | NA        | NA | NA | 5.8±3.1 | NA |
|                        |             | Placebo             | 17  | NA        | NA        | NA | NA | 7.0±3.3 | NA |
| Isolauri 1994          | Finland     | LGG                 | 21  | NA        | 1.5±0.7   | NA | NA | NA      | 2  |

|                           |        |                     |    |    |         |    |    |           |    |
|---------------------------|--------|---------------------|----|----|---------|----|----|-----------|----|
| [83]                      |        | No treatment        | 21 | NA | 2.3±0.8 | NA | NA | NA        | 9  |
| Cetina-Sauri<br>1994 [84] | Mexico | <i>S. boulardii</i> | 65 | NA | NA      | NA | NA | 3.76±2.31 | 41 |
|                           |        | Placebo             | 65 | NA | NA      | NA | NA | 4.38±2.73 | 58 |

**Footnote.** *Saccharomyces* (S.); *Lactobacillus* (L.); *Bifidobacterium* (B.); *Lactobacillus rhamnosus* GG (LGG); Not applicable (NA).

## References

- [1] Vaghela P, Langade RA. Analysis of impact of ors with zinc & probiotics supplements in curing acute diarrhoea. Article. International Journal of Research in Pharmaceutical Sciences, 2020;11(3):4054-4060.
- [2] Shin DY, Yi DY, Jo S, et al. Effect of a new *Lactobacillus plantarum* product, LRCC5310, on clinical symptoms and virus reduction in children with rotaviral enteritis. Medicine, 2020;99(38):e22192.
- [3] Mourey F, Sureja V, Kheni D, et al. A Multicenter, Randomized, Double-Blind, Placebo-Controlled Trial of *Saccharomyces boulardii* in Infants and Children With Acute Diarrhea. Pediatric infectious disease journal, 2020.
- [4] Kluijfhout S, Trieu TV, Vandenplas Y. Efficacy of the Probiotic Probiotical Confirmed in Acute Gastroenteritis. Pediatric gastroenterology, hepatology & nutrition. 2020;23(5):464-471.
- [5] Chen K, Xin J, Zhang G, et al. A combination of three probiotic strains for treatment of acute diarrhoea in hospitalised children: an open label, randomised controlled trial. Beneficial microbes, 2020;11(4):339-346.
- [6] Szymański H, Szajewska H. Lack of Efficacy of *Lactobacillus reuteri* DSM 17938 for the Treatment of Acute Gastroenteritis: a Randomized Controlled Trial. Pediatric infectious disease journal, 2019;38(10):e237-e242.
- [7] Sudha MR, Jayanthi N, Pandey DC, Verma AK. *Bacillus clausii* UBBC-07 reduces severity of diarrhoea in children under 5 years of age: a double blind placebo controlled study. Beneficial microbes. 2019;10(2):149-154.
- [8] Islam TMDT, Hussain T, Rahman A, Quaium SMMA, Hamid F. Clinical Efficacy of *Bacillus Clausii* Probiotic in the Management of Acute Diarrhoea in Children. Chattagram Maa-O-Shishu Hospital Medical College Journal, 2019;18(1):14-17.
- [9] D V, S V, S R. Role of *Saccharomyces boulardii* and *Bacillus clausii* in reducing the duration of diarrhea: a three-armed randomised controlled trial. International Journal of Contemporary Pediatrics, 2018;5(5).
- [10] Schnadower D, Tarr PI, Casper TC, et al. *Lactobacillus rhamnosus* GG versus Placebo for Acute Gastroenteritis in Children. New England journal of medicine, 2018;379(21):2002-2014.
- [11] Javeed A, Manzoor S, Wamiq S. Effect of oral *saccharomyces boulardii* supplementation on the duration of acute watery diarrhea in children. Pakistan journal of medical and health sciences, 2018;12(1):212-214.
- [12] Hong Chau TT, Minh Chau NN, Hoang Le NT, et al. A Double-blind, Randomized, Placebo-controlled Trial of *Lactobacillus acidophilus* for the Treatment of Acute Watery Diarrhea in Vietnamese Children. Pediatric infectious disease journal, 2018;37(1):35-42.
- [13] Freedman SB, Williamson-Urquhart S, Farion KJ, et al. Multicenter Trial of a Combination Probiotic for Children with Gastroenteritis. New England journal of medicine, 2018;379(21):2015-2026.
- [14] Bhat S, G. N. S, Savio CD. Efficacy of probiotics in acute diarrhoea in children. International Journal of Contemporary Pediatrics, 2018;5(4):1646-1650.
- [15] Sirsat GM, Sankpal DM. Role of *Saccharomyces boulardii* in management of acute diarrhoea of children - A randomized controlled trial. MedPulse International Journal of Pediatrics, 2017;4(3):68-72.
- [16] Park MS, Kwon B, Ku S, Ji GE. The Efficacy of *Bifidobacterium longum* BORI and *Lactobacillus*

- acidophilus AD031 Probiotic Treatment in Infants with Rotavirus Infection. *Nutrients*, 2017;9(8).
- [17] Burki MFK, Jabeen F. Efficacy of *saccharomyces boullardii* in children with acute diarrhea. *Medical forum monthly*, 2017;28(2):112-116.
- [18] Yazar AS, Güven Ş, Dinleyici E. Effects of zinc or synbiotic on the duration of diarrhea in children with acute infectious diarrhea. *Turkish journal of gastroenterology*, 2016;27(6):537-540.
- [19] Sharif MR, Kashani HH, Ardakani AT, Kheirkhah D, Tabatabaei F, Sharif A. The Effect of a Yeast Probiotic on Acute Diarrhea in Children. *Probiotics and antimicrobial proteins*, 2016;8(4):211-214.
- [20] García-Menor E, García-Marín F, Vecino-López R, et al. A Multicenter, Prospective, Randomized Controlled Trial to Evaluate the Additional Benefit of a Multistrain Synbiotic (Prodefen®) in the Clinical Management of Acute Viral Diarrhea in Children. *Global pediatric health*, 2016;3:2333794x16679587.
- [21] Dash DK, Dash M, Mohanty MD, Acharya N. Efficacy of probiotic *Saccharomyces boullardii* as an adjuvant therapy in acute childhood diarrhoea. *Journal of nepal paediatric society*, 2016;36(3):250-255.
- [22] Das S, Gupta PK, Das RR. Efficacy and Safety of *Saccharomyces boullardii* in Acute Rotavirus Diarrhea: double Blind Randomized Controlled Trial from a Developing Country. *Journal of tropical pediatrics*, 2016;62(6):464-470.
- [23] Lee DK, Park JE, Kim MJ, Seo JG, Lee JH, Ha NJ. Probiotic bacteria, *B. longum* and *L. acidophilus* inhibit infection by rotavirus in vitro and decrease the duration of diarrhea in pediatric patients. *Clinics and research in hepatology and gastroenterology*, 2015;39(2):237-244.
- [24] Hegar B, Waspada IM, Gunardi H, Vandenplas Y. A double blind randomized trial showing probiotics to be ineffective in acute diarrhea in Indonesian children. *Indian journal of pediatrics*, 2015;82(5):410-414.
- [25] Freedman SB, Sherman PM, Willan A, Johnson D, Gouin S, Schuh S. Emergency Department Treatment of Children With Diarrhea Who Attend Day Care: a Randomized Multidose Trial of a *Lactobacillus helveticus* and *Lactobacillus rhamnosus* Combination Probiotic. *Clinical pediatrics*, 2015;54(12):1158-1166.
- [26] El-Soud NHA, Said RN, Mosallam DS, Barakat NAM, Sabry MA. *Bifidobacterium lactis* in treatment of children with acute diarrhea. A randomized double blind controlled trial. *Macedonian journal of medical sciences*, 2015;3(3):403-407.
- [27] Dinleyici EC, Kara A, Dalgic N, et al. *Saccharomyces boullardii* CNCM I-745 reduces the duration of diarrhoea, length of emergency care and hospital stay in children with acute diarrhoea. *Beneficial microbes*, 2015;6(4):415-421.
- [28] Dinleyici EC, Dalgic N, Guven S, et al. *Lactobacillus reuteri* DSM 17938 shortens acute infectious diarrhea in a pediatric outpatient setting. *Jornal de pediatria*, 2015;91(4):392-396.
- [29] Sindhu KN, Sowmyanarayanan TV, Paul A, et al. Immune response and intestinal permeability in children with acute gastroenteritis treated with *Lactobacillus rhamnosus* GG: a randomized, double-blind, placebo-controlled trial. *Clinical infectious diseases*, 2014;58(8):1107-1115.
- [30] Dinleyici EC, Vandenplas Y. *Lactobacillus reuteri* DSM 17938 effectively reduces the duration of acute diarrhoea in hospitalised children. *Acta paediatrica*, 2014;103(7):e300-5.
- [31] Huang YF, Liu PY, Chen YY, et al. Three-combination probiotics therapy in children with salmonella and rotavirus gastroenteritis. *Journal of clinical gastroenterology*, 2014;48(1):37-42.
- [32] Azim K, Sheikh TS, Khan SN. Efficacy of probiotics (*Saccharomyces bulardii*) in acute watery diarrhoea in children. *Journal of Rawalpindi Medical College*, 2014;18(2):213-215.



- [33] Aggarwal S, Upadhyay A, Shah D, Teotia N, Agarwal A, Jaiswal V. Lactobacillus GG for treatment of acute childhood diarrhoea: an open labelled, randomized controlled trial. *Indian journal of medical research*, 2014;139(3):379-385.
- [34] Phavichitr N, Puwdee P, Tantibhaedhyangkul R. Cost-benefit analysis of the probiotic treatment of children hospitalized for acute diarrhea in Bangkok, Thailand. *Southeast Asian journal of tropical medicine and public health*, 2013;44(6):1065-1071.
- [35] Dinleyici EC, Dalgic N, Guven S, et al. The effect of a multispecies synbiotic mixture on the duration of diarrhea and length of hospital stay in children with acute diarrhea in Turkey: single blinded randomized study. *European journal of pediatrics*, 2013;172(4):459-464.
- [36] Burande M. Comparison of efficacy of *Saccharomyces boulardii* strain in the treatment of acute diarrhea in children: a prospective, single-blind, randomized controlled clinical trial. *Journal of pharmacology & pharmacotherapeutics*, 2013;4(3):205-208.
- [37] Riaz M, Alam S, Malik A, Ali SM. Efficacy and safety of *Saccharomyces boulardii* in acute childhood diarrhea: a double blind randomised controlled trial. *Indian journal of pediatrics*, 2012;79(4):478-482.
- [38] Nixon AF, Cunningham SJ, Cohen HW, Crain EF. The effect of Lactobacillus GG on acute diarrheal illness in the pediatric emergency department. *Pediatric emergency care*, 2012;28(10):1048-1051.
- [39] Khan A, Javed T, Chishti AL. Clinical efficacy of use of probiotic "*Saccharomyces boulardii*" In children with acute watery diarrhea. *Pakistan paediatric journal*, 2012;36(3):122-127.
- [40] Francavilla R, Lionetti E, Castellaneta S, et al. Randomised clinical trial: Lactobacillus reuteri DSM 17938 vs. placebo in children with acute diarrhoea - A double-blind study. *Alimentary Pharmacology and Therapeutics*, 2012;36(4):363-369.
- [41] Erdoğan O, Tanyeri B, Torun E, et al. The comparison of the efficacy of two different probiotics in rotavirus gastroenteritis in children. *Journal of tropical medicine*, 2012;2012:787240.
- [42] Vandenas Y, De Hert SG. Randomised clinical trial: the synbiotic food supplement Probiotal vs. placebo for acute gastroenteritis in children. *Alimentary pharmacology & therapeutics*, 2011;34(8):862-867.
- [43] Dutta P, Mitra U, Dutta S, Rajendran K, Saha TK, Chatterjee MK. Randomised controlled clinical trial of Lactobacillus sporogenes (*Bacillus coagulans*), used as probiotic in clinical practice, on acute watery diarrhoea in children. *Tropical medicine & international health*, 2011;16(5):555-561.
- [44] Dalgic N, Sancar M, Bayraktar B, Pullu M, Hasim O. Probiotic, zinc and lactose-free formula in children with rotavirus diarrhea: are they effective? *Pediatrics international*, 2011;53(5):677-682.
- [45] Corrêa NB, Penna FJ, Lima FM, Nicoli JR, Filho LA. Treatment of acute diarrhea with *Saccharomyces boulardii* in infants. *Journal of pediatric gastroenterology and nutrition*, 2011;53(5):497-501.
- [46] Ritchie BK, Brewster DR, Tran CD, Davidson GP, McNeil Y, Butler RN. Efficacy of Lactobacillus GG in aboriginal children with acute diarrhoeal disease: a randomised clinical trial. *Journal of pediatric gastroenterology and nutrition*, 2010;50(6):619-624.
- [47] Rerksuppaphol S, Rerksuppaphol L. Lactobacillus acidophilus and Bifidobacterium bifidum stored at ambient temperature are effective in the treatment of acute diarrhoea. *Annals of tropical paediatrics*, 2010;30(4):299-304.
- [48] Grandy G, Medina M, Soria R, Terán CG, Araya M. Probiotics in the treatment of acute rotavirus diarrhoea. A randomized, double-blind, controlled trial using two different probiotic preparations in Bolivian children. *BMC infectious diseases*, 2010;10:253.

- [49] Chen CC, Kong MS, Lai MW, et al. Probiotics have clinical, microbiologic, and immunologic efficacy in acute infectious diarrhea. *Pediatric infectious disease journal*, 2010;29(2):135-138.
- [50] Misra S, Sabui TK, Pal NK. A randomized controlled trial to evaluate the efficacy of lactobacillus GG in infantile diarrhea. *Journal of pediatrics*, 2009;155(1):129-132.
- [51] Teran CG, Teran-Escalera CN, Villarroel P. Nitazoxanide vs. probiotics for the treatment of acute rotavirus diarrhea in children: a randomized, single-blind, controlled trial in Bolivian children. *International journal of infectious diseases*, 2009;13(4):518-523.
- [52] Kianifar HR, Farid R, Ahanchian H, Jabbari F, Moghiman T, Sistanian A. Probiotics in the treatment of acute diarrhea in young children. *Iranian journal of medical sciences*, 2009;34(3):204-207.
- [53] Basu S, Paul DK, Ganguly S, Chatterjee M, Chandra PK. Efficacy of high-dose *Lactobacillus rhamnosus* GG in controlling acute watery diarrhea in Indian children: a randomized controlled trial. *Journal of clinical gastroenterology*, 2009;43(3):208-213.
- [54] Rafeey M, Ostadrahimi A, Boniadi M, Ghorashi Z, Alizadeh MM, Hadafeey V. *Lactobacillus acidophilus* yogurt and supplement in children with acute diarrhea: a clinical trial. *Research journal of medical sciences*, 2008;2(1):13-18.
- [55] Narayanappa D. Randomized double blinded controlled trial to evaluate the efficacy and safety of Bifilac in patients with acute viral diarrhea. *Indian journal of pediatrics*, 2008;75(7):709-713.
- [56] Mao M, Yu T, Xiong Y, et al. Effect of a lactose-free milk formula supplemented with bifidobacteria and streptococci on the recovery from acute diarrhoea. *Asia Pacific journal of clinical nutrition*, 2008;17(1):30-34.
- [57] Villarruel G, Rubio DM, Lopez F, et al. *Saccharomyces boulardii* in acute childhood diarrhoea: a randomized, placebo-controlled study. *Acta paediatrica*, 2007;96(4):538-541.
- [58] Ozkan TB, Sahin E, Erdemir G, Budak F. Effect of *Saccharomyces boulardii* in children with acute gastroenteritis and its relationship to the immune response. *Journal of international medical research*, 2007;35(2):201-212.
- [59] Canani RB, Cirillo P, Terrin G, et al. Probiotics for treatment of acute diarrhoea in children: randomised clinical trial of five different preparations. *BMJ*, 2007;335(7615):340.
- [60] Henker J, Laass M, Blokhin BM, et al. The probiotic *Escherichia coli* strain Nissle 1917 (EcN) stops acute diarrhoea in infants and toddlers. *European journal of pediatrics*, 2007;166(4):311-318.
- [61] Basu S, Chatterjee M, Ganguly S, Chandra PK. Efficacy of *Lactobacillus rhamnosus* GG in acute watery diarrhoea of Indian children: a randomised controlled trial. *Journal of paediatrics and child health*, 2007;43(12):837-842.
- [62] Vivatvakin B, Kowitdamrong E. Randomized control trial of live *Lactobacillus acidophilus* plus *Bifidobacterium infantis* in treatment of infantile acute watery diarrhea. *Chotmaihet thangphaet [Journal of the Medical Association of Thailand]*, 2006;89 Suppl 3:S126-33.
- [63] Szymański H, Pejcz J, Jawień M, Chmielarczyk A, Strus M, Heczko PB. Treatment of acute infectious diarrhoea in infants and children with a mixture of three *Lactobacillus rhamnosus* strains - A randomized, double-blind, placebo-controlled trial. *Alimentary Pharmacology and Therapeutics*, 2006;23(2):247-253.
- [64] Billoo AG, Memon MA, Khaskheli SA, et al. Role of a probiotic (*Saccharomyces boulardii*) in management and prevention of diarrhoea. *World journal of gastroenterology*, 2006;12(28):4557-4560.
- [65] Sarker SA, Sultana S, Fuchs GJ, et al. *Lactobacillus paracasei* strain ST11 has no effect on rotavirus but ameliorates the outcome of nonrotavirus diarrhea in children from Bangladesh. *Pediatrics*,

2005;116(2):e221-8.

- [66] Kurugöl Z, Koturoğlu G. Effects of *Saccharomyces boulardii* in children with acute diarrhoea. *Acta paediatrica*, 2005;94(1):44-47.
- [67] Kowalska-Duplaga K, Fyderek K, Szajewska H, Janiak R. Efficacy of Trilac® in the treatment of acute diarrhoea in infants and young children - A multicentre, randomized, double-blind placebo-controlled study. *Pediatrica contemporanea*, 2004;6(3):295-299.
- [68] Costa-Ribeiro H, Ribeiro TC, Mattos AP, et al. Limitations of probiotic therapy in acute, severe dehydrating diarrhea. *Journal of pediatric gastroenterology and nutrition*, 2003;36(1):112-115.
- [69] Rosenfeldt V, Michaelsen KF, Jakobsen M, et al. Effect of probiotic *Lactobacillus* strains on acute diarrhea in a cohort of nonhospitalized children attending day-care centers. *Pediatric infectious disease journal*, 2002;21(5):417-419.
- [70] Rosenfeldt V, Michaelsen KF, Jakobsen M, et al. Effect of probiotic *Lactobacillus* strains in young children hospitalized with acute diarrhea. *Pediatric infectious disease journal*, 2002;21(5):411-416.
- [71] Hafeez A, Tariq P, Ali S, Kundi ZU, Khan A, Hassan M. The efficacy of *Saccharomyces boulardii* in the treatment of acute watery diarrhea in children: a multicentre randomized controlled trial. *Journal of the College of Physicians and Surgeons--Pakistan : JCPSP*, 2002;12(7):432-434.
- [72] Urganci N, Polat T, Uysalol M, Cetinkaya F. Evaluation of the efficacy of *Saccharomyces boulardii* in children with acute diarrhoea. *Archives of gastroenterohepatology*, 2001;20(3-4):81-83.
- [73] Lee MC, Lin LH, Hung KL, Wu HY. Oral bacterial therapy promotes recovery from acute diarrhea in children. *Acta paediatrica Taiwanica*, 2001;42(5):301-305.
- [74] Boudraa G, Benbouabdellah M, Hachelaf W, Boisset M, Desjeux JF, Touhami M. Effect of feeding yogurt versus milk in children with acute diarrhea and carbohydrate malabsorption. *Journal of pediatric gastroenterology and nutrition*, 2001;33(3):307-313.
- [75] Guandalini S, Pensabene L, Zikri MA, et al. *Lactobacillus* GG administered in oral rehydration solution to children with acute diarrhea: a multicenter European trial. *Journal of pediatric gastroenterology and nutrition*. 2000;30(1):54-60. doi:10.1097/00005176-200001000-00018
- [76] Hernandez CL, Pineda EE, Jimenez MIR, Lucena MS. Clinical therapeutic affect of *Saccharomyces boulardii* on children with acute diarrhea. *Revista de enfermedades infecciosas en pediatria*, 1998;11(43):87-89.
- [77] Shornikova AV, Isolauri E, Burkanova L, Lukovnikova S, Vesikari T. A trial in the Karelian Republic of oral rehydration and *Lactobacillus* GG for treatment of acute diarrhoea. *Acta paediatrica*, 1997;86(5):460-465.
- [78] Shornikova AV, Casas IA, Mykkänen H, Salo E, Vesikari T. Bacteriotherapy with *Lactobacillus reuteri* in rotavirus gastroenteritis. *Pediatric infectious disease journal*, 1997;16(12):1103-1107.
- [79] Shornikova AV, Casas IA, Isolauri E, Mykkänen H, Vesikari T. *Lactobacillus reuteri* as a therapeutic agent in acute diarrhea in young children. *Journal of pediatric gastroenterology and nutrition*, 1997;24(4):399-404.
- [80] Guarino A, Canani RB, Spagnuolo MI, Albano F, Di Benedetto L. Oral bacterial therapy reduces the duration of symptoms and of viral excretion in children with mild diarrhea. *Journal of pediatric gastroenterology and nutrition*, 1997;25(5):516-519.
- [81] Pant AR, Graham SM, Allen SJ, et al. *Lactobacillus* GG and acute diarrhoea in young children in the tropics. *Journal of tropical pediatrics*, 1996;42(3):162-165.
- [82] Raza S, Graham SM, Allen SJ, Sultana S, Cuevas L, Hart CA. *Lactobacillus* GG promotes recovery

- from acute nonbloody diarrhea in Pakistan. *Pediatric infectious disease journal*, 1995;14(2):107-111.
- [83] Isolauri E, Kaila M, Mykkänen H, Ling WH, Salminen S. Oral bacteriotherapy for viral gastroenteritis. *Digestive diseases and sciences*, 1994;39(12):2595-2600.
- [84] Cetina-Sauri G, Sierra Basto G. Evaluation of *Saccharomyces boulardii* for the treatment of acute diarrhea in pediatric patients. *Annales de pediatrie*, 1994;41(6):397-400.

**Figure S1.** Risk of bias graph

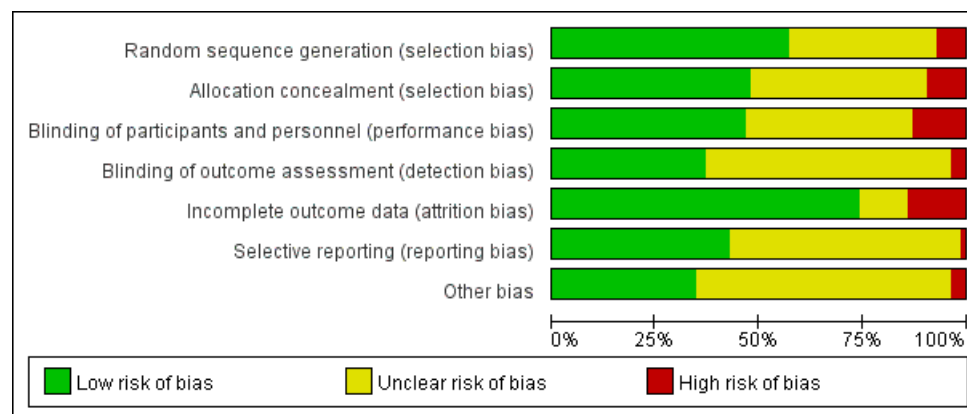

**Figure S2.** Risk of bias summary

|                       | Random sequence generation (selection bias) | Allocation concealment (selection bias) | Blinding of participants and personnel (performance bias) | Blinding of outcome assessment (detection bias) | Incomplete outcome data (attrition bias) | Selective reporting (reporting bias) | Other bias |
|-----------------------|---------------------------------------------|-----------------------------------------|-----------------------------------------------------------|-------------------------------------------------|------------------------------------------|--------------------------------------|------------|
| Agarwal 2014          | ●                                           | ●                                       | ●                                                         | ●                                               | ●                                        | ●                                    | ●          |
| Azm 2014              | ●                                           | ●                                       | ●                                                         | ●                                               | ●                                        | ●                                    | ●          |
| Basu 2009             | ●                                           | ●                                       | ●                                                         | ●                                               | ●                                        | ●                                    | ●          |
| Bhat 2018             | ●                                           | ●                                       | ●                                                         | ●                                               | ●                                        | ●                                    | ●          |
| Billico 2006          | ●                                           | ●                                       | ●                                                         | ●                                               | ●                                        | ●                                    | ●          |
| Boudras 2001          | ●                                           | ●                                       | ●                                                         | ●                                               | ●                                        | ●                                    | ●          |
| Burane 2013           | ●                                           | ●                                       | ●                                                         | ●                                               | ●                                        | ●                                    | ●          |
| Burn 2017             | ●                                           | ●                                       | ●                                                         | ●                                               | ●                                        | ●                                    | ●          |
| Camani 2007           | ●                                           | ●                                       | ●                                                         | ●                                               | ●                                        | ●                                    | ●          |
| Celins-Sauri 1984     | ●                                           | ●                                       | ●                                                         | ●                                               | ●                                        | ●                                    | ●          |
| Chen 2010             | ●                                           | ●                                       | ●                                                         | ●                                               | ●                                        | ●                                    | ●          |
| Chen 2020             | ●                                           | ●                                       | ●                                                         | ●                                               | ●                                        | ●                                    | ●          |
| Correa 2011           | ●                                           | ●                                       | ●                                                         | ●                                               | ●                                        | ●                                    | ●          |
| Costa-Ribeiro 2003    | ●                                           | ●                                       | ●                                                         | ●                                               | ●                                        | ●                                    | ●          |
| Dalgic 2011           | ●                                           | ●                                       | ●                                                         | ●                                               | ●                                        | ●                                    | ●          |
| Das 2016              | ●                                           | ●                                       | ●                                                         | ●                                               | ●                                        | ●                                    | ●          |
| Daeh 2016             | ●                                           | ●                                       | ●                                                         | ●                                               | ●                                        | ●                                    | ●          |
| Dinleyci 2013         | ●                                           | ●                                       | ●                                                         | ●                                               | ●                                        | ●                                    | ●          |
| Dinleyci 2014         | ●                                           | ●                                       | ●                                                         | ●                                               | ●                                        | ●                                    | ●          |
| Dinleyci 2015-1       | ●                                           | ●                                       | ●                                                         | ●                                               | ●                                        | ●                                    | ●          |
| Dinleyci 2015-2       | ●                                           | ●                                       | ●                                                         | ●                                               | ●                                        | ●                                    | ●          |
| Dutta 2011            | ●                                           | ●                                       | ●                                                         | ●                                               | ●                                        | ●                                    | ●          |
| El-Soud 2015          | ●                                           | ●                                       | ●                                                         | ●                                               | ●                                        | ●                                    | ●          |
| Ertogan 2012          | ●                                           | ●                                       | ●                                                         | ●                                               | ●                                        | ●                                    | ●          |
| Francisella 2012      | ●                                           | ●                                       | ●                                                         | ●                                               | ●                                        | ●                                    | ●          |
| Freeman 2015          | ●                                           | ●                                       | ●                                                         | ●                                               | ●                                        | ●                                    | ●          |
| Freeman 2018          | ●                                           | ●                                       | ●                                                         | ●                                               | ●                                        | ●                                    | ●          |
| Garcia-Menor 2016     | ●                                           | ●                                       | ●                                                         | ●                                               | ●                                        | ●                                    | ●          |
| Grady 2010            | ●                                           | ●                                       | ●                                                         | ●                                               | ●                                        | ●                                    | ●          |
| Guandalini 2000       | ●                                           | ●                                       | ●                                                         | ●                                               | ●                                        | ●                                    | ●          |
| Quarino 1987          | ●                                           | ●                                       | ●                                                         | ●                                               | ●                                        | ●                                    | ●          |
| Hafeez 2002           | ●                                           | ●                                       | ●                                                         | ●                                               | ●                                        | ●                                    | ●          |
| Hegar 2015            | ●                                           | ●                                       | ●                                                         | ●                                               | ●                                        | ●                                    | ●          |
| Henker 2007           | ●                                           | ●                                       | ●                                                         | ●                                               | ●                                        | ●                                    | ●          |
| Hernandez 1988        | ●                                           | ●                                       | ●                                                         | ●                                               | ●                                        | ●                                    | ●          |
| Hong Chau 2018        | ●                                           | ●                                       | ●                                                         | ●                                               | ●                                        | ●                                    | ●          |
| Huang 2014            | ●                                           | ●                                       | ●                                                         | ●                                               | ●                                        | ●                                    | ●          |
| Islam 2019            | ●                                           | ●                                       | ●                                                         | ●                                               | ●                                        | ●                                    | ●          |
| Isidauri 1994         | ●                                           | ●                                       | ●                                                         | ●                                               | ●                                        | ●                                    | ●          |
| Javeed 2018           | ●                                           | ●                                       | ●                                                         | ●                                               | ●                                        | ●                                    | ●          |
| Khan 2012             | ●                                           | ●                                       | ●                                                         | ●                                               | ●                                        | ●                                    | ●          |
| Kianfar 2009          | ●                                           | ●                                       | ●                                                         | ●                                               | ●                                        | ●                                    | ●          |
| Kulifout 2020         | ●                                           | ●                                       | ●                                                         | ●                                               | ●                                        | ●                                    | ●          |
| Kowalska-Duplaga 2004 | ●                                           | ●                                       | ●                                                         | ●                                               | ●                                        | ●                                    | ●          |
| Kunugi 2005           | ●                                           | ●                                       | ●                                                         | ●                                               | ●                                        | ●                                    | ●          |
| Lee 2001              | ●                                           | ●                                       | ●                                                         | ●                                               | ●                                        | ●                                    | ●          |
| Lee 2015              | ●                                           | ●                                       | ●                                                         | ●                                               | ●                                        | ●                                    | ●          |
| Mao 2008              | ●                                           | ●                                       | ●                                                         | ●                                               | ●                                        | ●                                    | ●          |
| Misra 2009            | ●                                           | ●                                       | ●                                                         | ●                                               | ●                                        | ●                                    | ●          |
| Mouruy 2020           | ●                                           | ●                                       | ●                                                         | ●                                               | ●                                        | ●                                    | ●          |
| Narayanan 2008        | ●                                           | ●                                       | ●                                                         | ●                                               | ●                                        | ●                                    | ●          |
| Nixon 2012            | ●                                           | ●                                       | ●                                                         | ●                                               | ●                                        | ●                                    | ●          |
| Ozkan 2007            | ●                                           | ●                                       | ●                                                         | ●                                               | ●                                        | ●                                    | ●          |
| Park 1986             | ●                                           | ●                                       | ●                                                         | ●                                               | ●                                        | ●                                    | ●          |
| Park 2017             | ●                                           | ●                                       | ●                                                         | ●                                               | ●                                        | ●                                    | ●          |
| Phanchit 2013         | ●                                           | ●                                       | ●                                                         | ●                                               | ●                                        | ●                                    | ●          |
| Rafley 2008           | ●                                           | ●                                       | ●                                                         | ●                                               | ●                                        | ●                                    | ●          |
| Raza 1985             | ●                                           | ●                                       | ●                                                         | ●                                               | ●                                        | ●                                    | ●          |
| Reksupphol 2010       | ●                                           | ●                                       | ●                                                         | ●                                               | ●                                        | ●                                    | ●          |
| Riz 2012              | ●                                           | ●                                       | ●                                                         | ●                                               | ●                                        | ●                                    | ●          |
| Ritchie 2010          | ●                                           | ●                                       | ●                                                         | ●                                               | ●                                        | ●                                    | ●          |
| Rosenfeld 2002-1      | ●                                           | ●                                       | ●                                                         | ●                                               | ●                                        | ●                                    | ●          |
| Rosenfeld 2002-2      | ●                                           | ●                                       | ●                                                         | ●                                               | ●                                        | ●                                    | ●          |
| Sarker 2005           | ●                                           | ●                                       | ●                                                         | ●                                               | ●                                        | ●                                    | ●          |
| Schnadower 2018       | ●                                           | ●                                       | ●                                                         | ●                                               | ●                                        | ●                                    | ●          |
| Sharf 2016            | ●                                           | ●                                       | ●                                                         | ●                                               | ●                                        | ●                                    | ●          |
| Shin 2020             | ●                                           | ●                                       | ●                                                         | ●                                               | ●                                        | ●                                    | ●          |
| Shonkova 1997-1       | ●                                           | ●                                       | ●                                                         | ●                                               | ●                                        | ●                                    | ●          |
| Shonkova 1997-2       | ●                                           | ●                                       | ●                                                         | ●                                               | ●                                        | ●                                    | ●          |
| Shonkova 1997-3       | ●                                           | ●                                       | ●                                                         | ●                                               | ●                                        | ●                                    | ●          |
| Sindhu 2014           | ●                                           | ●                                       | ●                                                         | ●                                               | ●                                        | ●                                    | ●          |
| Sirsat 2017           | ●                                           | ●                                       | ●                                                         | ●                                               | ●                                        | ●                                    | ●          |
| Sudha 2019            | ●                                           | ●                                       | ●                                                         | ●                                               | ●                                        | ●                                    | ●          |
| Szymanski 2006        | ●                                           | ●                                       | ●                                                         | ●                                               | ●                                        | ●                                    | ●          |
| Szymanski 2019        | ●                                           | ●                                       | ●                                                         | ●                                               | ●                                        | ●                                    | ●          |
| Teran 2009            | ●                                           | ●                                       | ●                                                         | ●                                               | ●                                        | ●                                    | ●          |
| Ugarcic 2001          | ●                                           | ●                                       | ●                                                         | ●                                               | ●                                        | ●                                    | ●          |
| Vajapala 2020         | ●                                           | ●                                       | ●                                                         | ●                                               | ●                                        | ●                                    | ●          |
| Vanderplas 2011       | ●                                           | ●                                       | ●                                                         | ●                                               | ●                                        | ●                                    | ●          |
| Vijleadevan 2018      | ●                                           | ●                                       | ●                                                         | ●                                               | ●                                        | ●                                    | ●          |
| Villanuel 2007        | ●                                           | ●                                       | ●                                                         | ●                                               | ●                                        | ●                                    | ●          |
| Vivekan 2006          | ●                                           | ●                                       | ●                                                         | ●                                               | ●                                        | ●                                    | ●          |
| Yazar 2016            | ●                                           | ●                                       | ●                                                         | ●                                               | ●                                        | ●                                    | ●          |

**Figure S3.** Incoherence plot for the duration of diarrhea (control = placebo/no treatment)

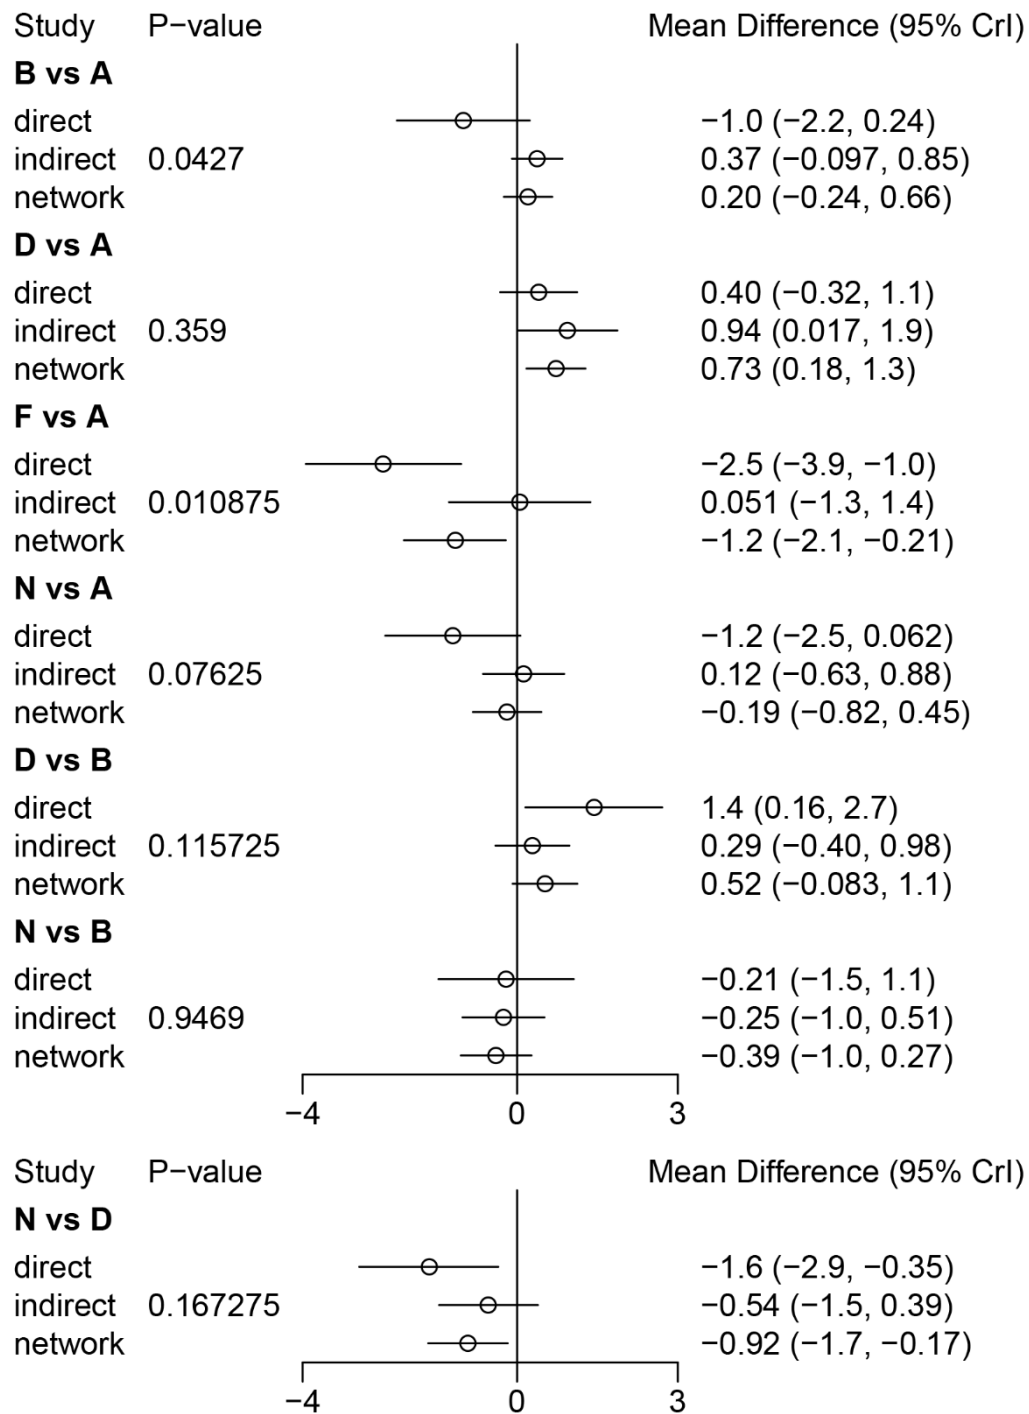

**Footnote.** A, *S. boulardii*; B, LGG; D, *Bacillus clausii*; F, *B. lactis*; N, *L. species (spp)* + *B. spp* + *S. spp*.

**Figure S4.** Incoherence plot for the duration of diarrhea (control = no treatment)

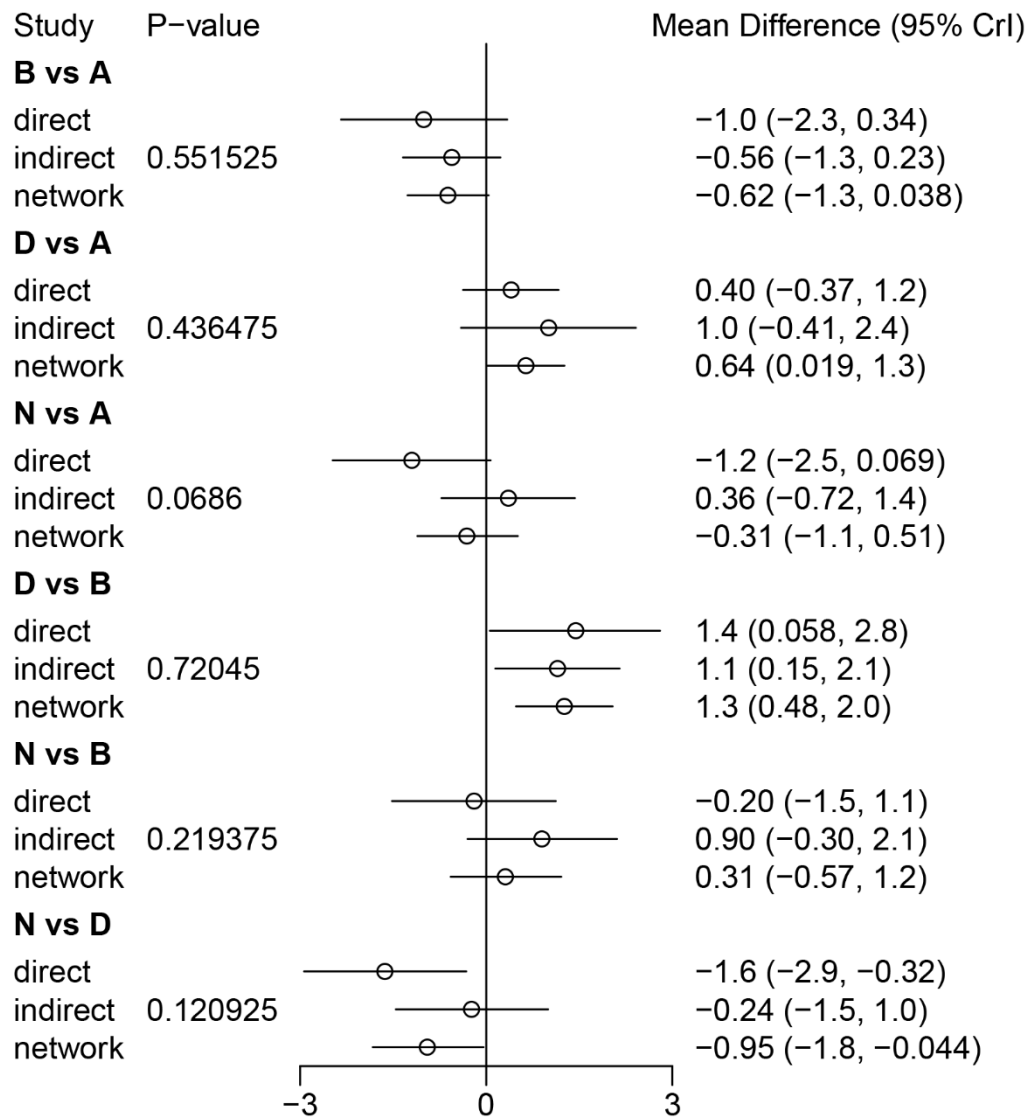

**Footnote.** A, *S. boulardii*; B, LGG; D, *Bacillus clausii*; F, *B. lactis*; N, *L. spp* + *B. spp* + *S. spp*.

**Figure S5.** Incoherence plot for the duration of hospitalization

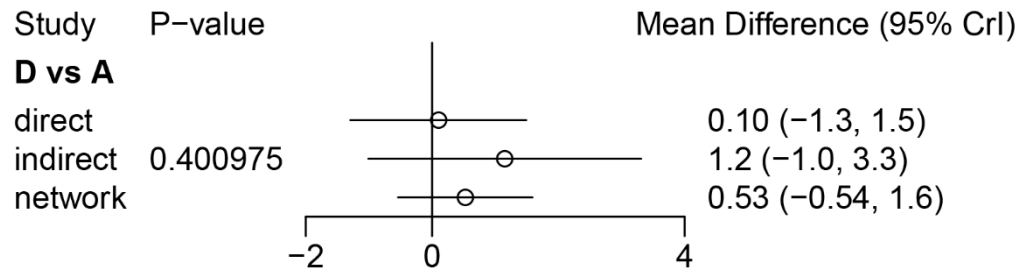

**Footnote.** A, *S. boulardii*; D, *Bacillus clausii*.

**Figure S6.** Incoherence plot for the mean stool frequency on day 2

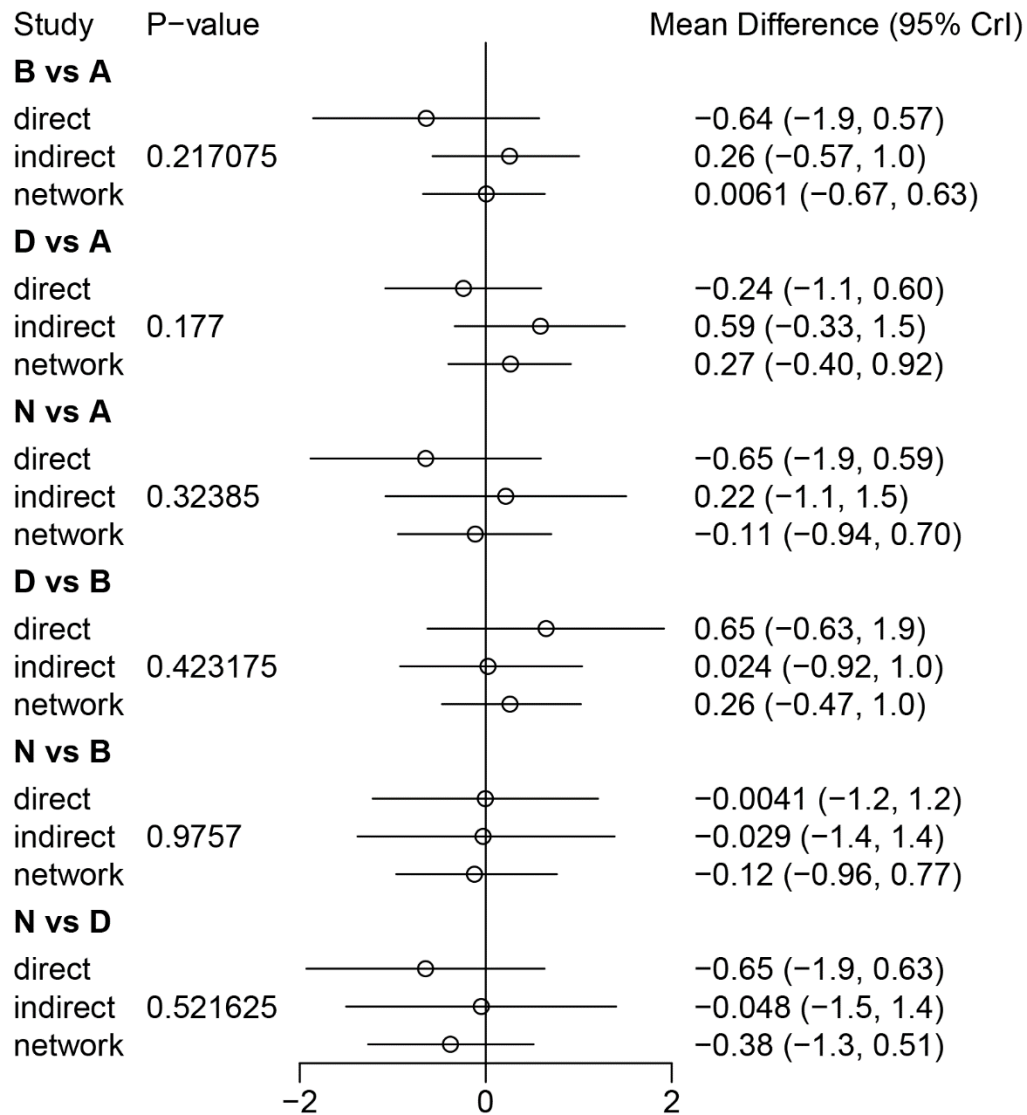

**Footnote.** A, *S. boulardii*; B, LGG; D, *Bacillus clausii*; N, *L. spp* + *B. spp* + *S. spp*.



**Figure S7.** Incoherence plot for the duration of vomiting

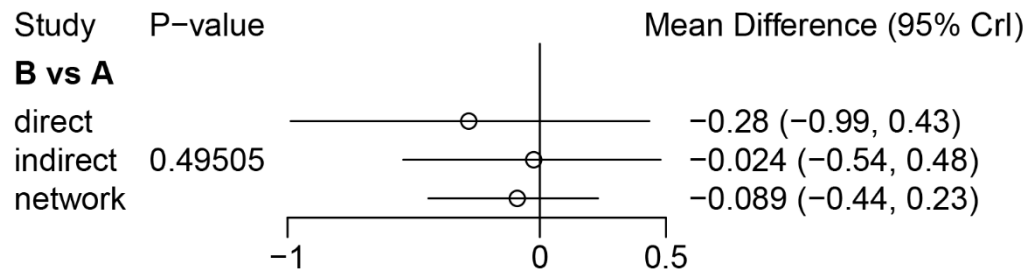

**Footnote.** A, *S. boulardii*; B, LGG.

**Figure S8.** Incoherence plot for the duration of fever

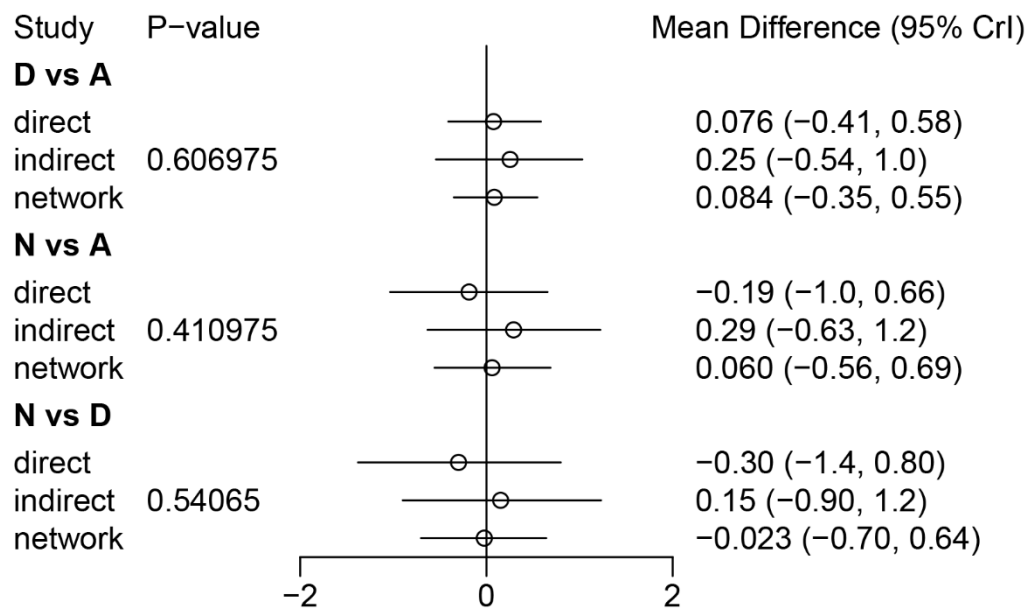

**Footnote.** A, *S. boulardii*; D, *Bacillus clausii*; N, *L. spp* + *B. spp* + *S. spp*.

**Table S3.** Heterogeneity for the duration of diarrhea (control = placebo/no treatment)

| Comparison | <i>I</i> <sup>2</sup> (pair-wise) | <i>I</i> <sup>2</sup> (network) | P     |
|------------|-----------------------------------|---------------------------------|-------|
| A vs B     | NA                                | 97.4%                           | 0.032 |
| A vs D     | 0                                 | 76.7%                           | 0.11  |
| A vs F     | NA                                | 88.9%                           | 0.024 |
| A vs K     | NA                                | NA                              | NA    |
| A vs N     | NA                                | 95.8%                           | 0.053 |
| A vs U     | 87.6%                             | 88.4%                           | NA    |
| B vs D     | NA                                | 80.0%                           | 0.15  |
| B vs K     | NA                                | NA                              | NA    |
| B vs N     | NA                                | 0                               | 0.81  |
| B vs U     | 98.1%                             | 98.3%                           | NA    |
| C vs U     | 49.9%                             | 49.9%                           | NA    |
| D vs K     | NA                                | NA                              | NA    |
| D vs N     | NA                                | 62.8%                           | 0.26  |
| D vs U     | 55.1%                             | 54.7%                           | NA    |
| E vs U     | NA                                | NA                              | NA    |
| F vs U     | 93.1%                             | 95.4%                           | NA    |
| G vs U     | NA                                | NA                              | NA    |
| H vs U     | NA                                | NA                              | NA    |
| I vs U     | NA                                | NA                              | NA    |
| J vs U     | NA                                | NA                              | NA    |
| K vs N     | NA                                | NA                              | NA    |
| K vs U     | NA                                | NA                              | NA    |
| L vs U     | 47.4%                             | 48.1%                           | NA    |
| M vs U     | 64.0%                             | 64.0%                           | NA    |
| N vs U     | 3.2%                              | 14.2%                           | NA    |
| O vs U     | NA                                | NA                              | NA    |
| P vs U     | NA                                | NA                              | NA    |
| Q vs U     | 0                                 | 0                               | NA    |
| R vs U     | NA                                | NA                              | NA    |
| S vs U     | NA                                | NA                              | NA    |

|        |    |    |    |
|--------|----|----|----|
| T vs U | NA | NA | NA |
|--------|----|----|----|

**Footnote.** A, *S. boulardii*; B, LGG; C, *L. reuteri*; D, *Bacillus clausii*; E, *L. acidophilus*; F, *B. lactis*; G, *L. sporogenes*; H, *L. plantarum*; I, ECN 1917; J, *L. paracasei*; K, *E. faecium*; L, *L. spp*; M, *L. spp* + *B. spp*; N, *L. spp* + *B. spp* + *S. spp*; O, *L. spp* + *S. spp*; P, *B. spp* + *S. spp*; Q, *Bacillus spp* + *E. spp* + *C. spp*; R, *L. spp* + *B. spp* + *E. spp*; S, *L. spp* + *B. spp* + *P. spp*; T, *L. spp* + *S. spp* + *C. spp* + *Bacillus spp*; U, Control (placebo/no treatment).

**Table S4.** Heterogeneity for the duration of diarrhea (control = placebo)

| Comparison | $I^2$ (pair-wise) | $I^2$ (network) | P  |
|------------|-------------------|-----------------|----|
| A vs U     | 73.9%             | 73.8%           | NA |
| B vs U     | 83.6%             | 83.6%           | NA |
| C vs U     | 0                 | 0               | NA |
| D vs U     | NA                | NA              | NA |
| E vs U     | NA                | NA              | NA |
| F vs U     | NA                | NA              | NA |
| G vs U     | NA                | NA              | NA |
| I vs U     | NA                | NA              | NA |
| J vs U     | NA                | NA              | NA |
| L vs U     | 42.9%             | 42.9%           | NA |
| M vs U     | 70.5%             | 70.5%           | NA |
| N vs U     | 0                 | 0               | NA |
| P vs U     | NA                | NA              | NA |
| Q vs U     | NA                | NA              | NA |
| S vs U     | NA                | NA              | NA |
| T vs U     | NA                | NA              | NA |

**Footnote.** A, *S. boulardii*; B, LGG; C, *L. reuteri*; D, *Bacillus clausii*; E, *L. acidophilus*; F, *B. lactis*; G, *L. sporogenes*; I, ECN 1917; J, *L. paracasei*; L, *L. spp*; M, *L. spp* + *B. spp*; N, *L. spp* + *B. spp* + *S. spp*; P, *B. spp* + *S. spp*; Q, *Bacillus spp* + *E. spp* + *C. spp*; S, *L. spp* + *B. spp* + *P. spp*; T, *L. spp* + *S. spp* + *C. spp* + *Bacillus spp*; U, Control (placebo).

**Table S5.** Heterogeneity for the duration of diarrhea (control = no treatment)

| Comparison | <i>I</i> <sup>2</sup> (pair-wise) | <i>I</i> <sup>2</sup> (network) | P     |
|------------|-----------------------------------|---------------------------------|-------|
| A vs B     | NA                                | 75.7%                           | 0.47  |
| A vs D     | 0                                 | 58.7%                           | 0.17  |
| A vs F     | NA                                | NA                              | NA    |
| A vs K     | NA                                | NA                              | NA    |
| A vs N     | NA                                | 94.7%                           | 0.067 |
| A vs U     | 89.1%                             | 88.7%                           | NA    |
| B vs D     | NA                                | 0                               | 0.76  |
| B vs K     | NA                                | NA                              | NA    |
| B vs N     | NA                                | 0                               | 0.53  |
| B vs U     | 97.5%                             | 97.5%                           | NA    |
| C vs U     | 86.1%                             | 86.1%                           | NA    |
| D vs K     | NA                                | NA                              | NA    |
| D vs N     | NA                                | 61.2%                           | 0.26  |
| D vs U     | 66.5%                             | 68.0%                           | NA    |
| F vs U     | NA                                | NA                              | NA    |
| H vs U     | NA                                | NA                              | NA    |
| K vs N     | NA                                | NA                              | NA    |
| K vs U     | NA                                | NA                              | NA    |
| M vs U     | 65.0%                             | 65.3%                           | NA    |
| N vs U     | 32.8%                             | 65.8%                           | NA    |
| O vs U     | NA                                | NA                              | NA    |
| Q vs U     | NA                                | NA                              | NA    |
| R vs U     | NA                                | NA                              | NA    |

**Footnote.** A, *S. boulardii*; B, LGG; C, *L. reuteri*; D, *Bacillus clausii*; F, *B. lactis*; H, *L. plantarum*; K, *E. faecium*; M, *L. spp* + *B. spp*; N, *L. spp* + *B. spp* + *S. spp*; O, *L. spp* + *S. spp*; Q, *Bacillus spp* + *E. spp* + *C. spp*; R, *L. spp* + *B. spp* + *E. spp*; U, Control (no treatment).

**Table S6.** Heterogeneity for diarrhea lasting  $\geq 2$  days

| Comparison | $I^2$ (pair-wise) | $I^2$ (network) | P  |
|------------|-------------------|-----------------|----|
| A vs U     | 91.6%             | 91.6%           | NA |
| B vs U     | 81.9%             | 82.0%           | NA |
| C vs U     | 67.4%             | 67.4%           | NA |
| D vs U     | NA                | NA              | NA |
| E vs U     | NA                | NA              | NA |
| I vs U     | NA                | NA              | NA |
| L vs U     | NA                | NA              | NA |
| M vs U     | 0                 | 0               | NA |
| N vs U     | 46.0%             | 46.7%           | NA |
| O vs U     | NA                | NA              | NA |
| R vs U     | NA                | NA              | NA |

**Footnote.** **A**, *S. boulardii*; **B**, LGG; **C**, *L. reuteri*; **D**, *Bacillus clausii*; **E**, *L. acidophilus*; **I**, *ECN 1917*; **L**, *L. spp*; **M**, *L. spp* + *B. spp*; **N**, *L. spp* + *B. spp* + *S. spp*; **O**, *L. spp* + *S. spp*; **P**, *B. spp* + *S. spp*; **R**, *L. spp* + *B. spp* + *E. spp*; **U**, Control (placebo/no treatment).

**Table S7.** Heterogeneity for the duration of hospitalization

| Comparison | $I^2$ (pair-wise) | $I^2$ (network) | P    |
|------------|-------------------|-----------------|------|
| A vs D     | 92.3%             | 82.1%           | 0.26 |
| A vs U     | 91.4%             | 91.6%           | NA   |
| B vs U     | 99.0%             | 99.0%           | NA   |
| C vs U     | 85.2%             | 85.2%           | NA   |
| D vs U     | 0                 | 72.0%           | NA   |
| E vs U     | 79.8%             | 80.0%           | NA   |
| F vs U     | NA                | NA              | NA   |
| H vs U     | NA                | NA              | NA   |
| L vs U     | NA                | NA              | NA   |
| M vs U     | 62.2%             | 62.2%           | NA   |
| N vs U     | NA                | NA              | NA   |
| Q vs U     | 96.3%             | 96.3%           | NA   |
| R vs U     | NA                | NA              | NA   |

**Footnote.** **A**, *S. boulardii*; **B**, LGG; **C**, *L. reuteri*; **D**, *Bacillus clausii*; **E**, *L. acidophilus*; **H**, *L. plantarum*; **L**, *L. spp*; **M**, *L. spp* + *B. spp*; **N**, *L. spp* + *B. spp* + *S. spp*; **Q**, *Bacillus spp* + *E. spp* + *C. spp*; **R**, *L. spp* + *B. spp* + *E. spp*; **U**, Control (placebo/no treatment).

**Table S8.** Heterogeneity for the mean stool frequency on day 2

| Comparison | $I^2$ (pair-wise) | $I^2$ (network) | P    |
|------------|-------------------|-----------------|------|
| A vs B     | NA                | 59.7%           | 0.25 |
| A vs D     | 0                 | 62.0%           | 0.11 |
| A vs K     | NA                | NA              | NA   |
| A vs N     | NA                | 46.0%           | 0.30 |
| A vs U     | 84.5%             | 87.6%           | NA   |
| B vs D     | NA                | 2.22%           | 0.46 |
| B vs K     | NA                | NA              | NA   |
| B vs N     | NA                | 0               | 0.75 |
| B vs U     | 49.2%             | 62.9%           | NA   |
| C vs U     | 49.0%             | 49.2%           | NA   |
| D vs K     | NA                | NA              | NA   |
| D vs N     | NA                | 0               | 0.57 |
| E vs U     | NA                | NA              | NA   |
| K vs N     | NA                | NA              | NA   |
| K vs U     | NA                | NA              | NA   |
| L vs U     | 98.9%             | 99.2%           | NA   |
| M vs U     | 80.5%             | 80.7%           | NA   |
| N vs U     | 0                 | 0               | NA   |
| Q vs U     | NA                | NA              | NA   |
| R vs U     | NA                | NA              | NA   |
| T vs U     | NA                | NA              | NA   |

**Footnote.** **A**, *S. boulardii*; **B**, LGG; **C**, *L. reuteri*; **D**, *Bacillus clausii*; **E**, *L. acidophilus*; **K**, *E. faecium*; **L**, *L. spp*; **M**, *L. spp* + *B. spp*; **N**, *L. spp* + *B. spp* + *S. spp*; **Q**, *Bacillus spp* + *E. spp* + *C. spp*; **R**, *L. spp* + *B. spp* + *E. spp*; **T**, *L. spp* + *S. spp* + *C. spp* + *Bacillus spp*; **U**, Control (placebo/no treatment).

**Table S9.** Heterogeneity for the duration of vomiting

| Comparison | $I^2$ (pair-wise) | $I^2$ (network) | P    |
|------------|-------------------|-----------------|------|
| A vs B     | NA                | 0               | 0.66 |
| A vs D     | NA                | NA              | NA   |
| A vs K     | NA                | NA              | NA   |
| A vs N     | NA                | NA              | NA   |
| A vs U     | 83.7%             | 84.3%           | NA   |
| B vs D     | NA                | NA              | NA   |
| B vs K     | NA                | NA              | NA   |
| B vs N     | NA                | NA              | NA   |
| B vs U     | 0                 | 0               | NA   |
| D vs K     | NA                | NA              | NA   |
| D vs N     | NA                | NA              | NA   |
| D vs U     | NA                | NA              | NA   |
| H vs U     | NA                | NA              | NA   |
| K vs N     | NA                | NA              | NA   |
| K vs U     | NA                | NA              | NA   |
| L vs U     | 0                 | 0               | NA   |
| N vs U     | NA                | NA              | NA   |
| Q vs U     | NA                | NA              | NA   |
| S vs U     | NA                | NA              | NA   |

**Footnote.** A, *S. boulardii*; B, LGG; D, *Bacillus clausii*; H, *L. plantarum*; K, *E. faecium*; L, *L. spp*; N, *L. spp* + *B. spp* + *S. spp*; Q, *Bacillus spp* + *E. spp* + *C. spp*; S, *L. spp* + *B. spp* + *P. spp*; U, Control (placebo/no treatment).



**Table S10.** Heterogeneity for the duration of fever

| Comparison | $I^2$ (pair-wise) | $I^2$ (network) | P    |
|------------|-------------------|-----------------|------|
| A vs B     | NA                | NA              | NA   |
| A vs D     | 0                 | 0               | 0.98 |
| A vs K     | NA                | NA              | NA   |
| A vs N     | NA                | 0               | 0.47 |
| A vs U     | 83.6%             | 83.9%           | NA   |
| B vs D     | NA                | NA              | NA   |
| B vs K     | NA                | NA              | NA   |
| B vs N     | NA                | NA              | NA   |
| B vs U     | NA                | NA              | NA   |
| D vs K     | NA                | NA              | NA   |
| D vs N     | NA                | 0               | 0.91 |
| D vs U     | 47.1%             | 34.0%           | NA   |
| F vs U     | NA                | NA              | NA   |
| H vs U     | NA                | NA              | NA   |
| K vs N     | NA                | NA              | NA   |
| K vs U     | NA                | NA              | NA   |
| L vs U     | NA                | NA              | NA   |
| M vs U     | NA                | NA              | NA   |
| N vs U     | 0                 | 0               | NA   |
| Q vs U     | 76.6%             | 76.5%           | NA   |
| S vs U     | NA                | NA              | NA   |

**Footnote.** **A**, *S. boulardii*; **B**, LGG; **D**, *Bacillus clausii*; **F**, *B. lactis*; **H**, *L. plantarum*; **K**, *E. faecium*; **L**, *L. spp*; **M**, *L. spp* + *B. spp*; **N**, *L. spp* + *B. spp* + *S. spp*; **Q**, *Bacillus spp* + *E. spp* + *C. spp*; **S**, *L. spp* + *B. spp* + *P. spp*; **U**, Control (placebo/no treatment).

**Table S11.** NMA results for the duration of diarrhea (control = placebo/no treatment)

|          |                      |                     |                     |                     |                    |                      |                    |                     |                    |          |  |  |  |  |  |  |  |  |  |  |  |
|----------|----------------------|---------------------|---------------------|---------------------|--------------------|----------------------|--------------------|---------------------|--------------------|----------|--|--|--|--|--|--|--|--|--|--|--|
| <b>A</b> | <b>A</b>             |                     |                     |                     |                    |                      |                    |                     |                    |          |  |  |  |  |  |  |  |  |  |  |  |
| <b>B</b> | 1.0 (-0.24, 2.2)     | <b>B</b>            |                     |                     |                    |                      |                    |                     |                    |          |  |  |  |  |  |  |  |  |  |  |  |
| <b>C</b> | -0.07 (-0.73, 0.59)  | 0.13 (-0.55, 0.81)  | <b>C</b>            |                     |                    |                      |                    |                     |                    |          |  |  |  |  |  |  |  |  |  |  |  |
| <b>D</b> | -0.73 (-1.28, -0.17) | -0.52 (-1.13, 0.08) | -0.65 (-1.44, 0.12) | <b>D</b>            |                    |                      |                    |                     |                    |          |  |  |  |  |  |  |  |  |  |  |  |
| <b>E</b> | -1.01 (-2.34, 0.31)  | -0.81 (-2.15, 0.53) | -0.94 (-2.36, 0.48) | -0.29 (-1.68, 1.1)  | <b>E</b>           |                      |                    |                     |                    |          |  |  |  |  |  |  |  |  |  |  |  |
| <b>F</b> | 2.5 (1.0, 3.9)       | 1.35 (0.37, 2.34)   | 1.22 (0.14, 2.32)   | 1.88 (0.83, 2.93)   | 2.16 (0.58, 3.76)  | <b>F</b>             |                    |                     |                    |          |  |  |  |  |  |  |  |  |  |  |  |
| <b>G</b> | -0.89 (-2.19, 0.41)  | -0.68 (-2, 0.63)    | -0.81 (-2.21, 0.58) | -0.16 (-1.53, 1.21) | 0.13 (-1.68, 1.94) | -2.04 (-3.61, -0.48) | <b>G</b>           |                     |                    |          |  |  |  |  |  |  |  |  |  |  |  |
| <b>H</b> | 0.24 (-1.08, 1.57)   | 0.45 (-0.89, 1.78)  | 0.32 (-1.1, 1.73)   | 0.97 (-0.42, 2.36)  | 1.26 (-0.57, 3.08) | -0.91 (-2.5, 0.68)   | 1.13 (-0.67, 2.94) | <b>H</b>            |                    |          |  |  |  |  |  |  |  |  |  |  |  |
| <b>I</b> | 0.45 (-0.85, 1.75)   | 0.65 (-0.65, 1.96)  | 0.53 (-0.87, 1.92)  | 1.18 (-0.19, 2.55)  | 1.46 (-0.34, 3.28) | -0.7 (-2.27, 0.86)   | 1.34 (-0.45, 3.12) | 0.21 (-1.6, 2.02)   | <b>I</b>           |          |  |  |  |  |  |  |  |  |  |  |  |
| <b>J</b> | -0.82 (-2.18, 0.53)  | -0.62 (-1.99, 0.74) | -0.75 (-2.19, 0.7)  | -0.1 (-1.52, 1.32)  | 0.19 (-1.66, 2.04) | -1.97 (-3.59, -0.37) | 0.06 (-1.77, 1.9)  | -1.07 (-2.92, 0.78) | -1.28 (-3.1, 0.55) | <b>J</b> |  |  |  |  |  |  |  |  |  |  |  |

|          |                      |                     |                     |                     |                     |                      |                     |                     |                     |                     |                    |                     |                     |                     |                     |                    |                    |                     |                |          |  |
|----------|----------------------|---------------------|---------------------|---------------------|---------------------|----------------------|---------------------|---------------------|---------------------|---------------------|--------------------|---------------------|---------------------|---------------------|---------------------|--------------------|--------------------|---------------------|----------------|----------|--|
| <b>K</b> | -1.14 (-2.21, -0.08) | -0.94 (-2.01, 0.13) | -1.07 (-2.27, 0.12) | -0.42 (-1.53, 0.69) | -0.13 (-1.79, 1.54) | -2.29 (-3.69, -0.91) | -0.26 (-1.9, 1.38)  | -1.39 (-3.05, 0.27) | -1.59 (-3.24, 0.04) | -0.32 (-2, 1.36)    | <b>K</b>           |                     |                     |                     |                     |                    |                    |                     |                |          |  |
| <b>L</b> | -0.68 (-1.37, 0.02)  | -0.47 (-1.18, 0.24) | -0.61 (-1.46, 0.25) | 0.05 (-0.76, 0.86)  | 0.34 (-1.09, 1.78)  | -1.83 (-2.94, -0.71) | 0.21 (-1.2, 1.62)   | -0.92 (-2.35, 0.52) | -1.13 (-2.54, 0.28) | 0.14 (-1.31, 1.61)  | 0.47 (-0.75, 1.69) | <b>L</b>            |                     |                     |                     |                    |                    |                     |                |          |  |
| <b>M</b> | -0.12 (-0.68, 0.43)  | 0.08 (-0.49, 0.66)  | -0.05 (-0.8, 0.7)   | 0.6 (-0.09, 1.3)    | 0.89 (-0.48, 2.27)  | -1.27 (-2.31, -0.24) | 0.76 (-0.58, 2.12)  | -0.36 (-1.73, 1.01) | -0.57 (-1.92, 0.78) | 0.7 (-0.69, 2.11)   | 1.02 (-0.12, 2.17) | 0.56 (-0.23, 1.33)  | <b>M</b>            |                     |                     |                    |                    |                     |                |          |  |
| <b>N</b> | 0.19 (-0.46, 0.82)   | 0.39 (-0.27, 1.05)  | 0.26 (-0.56, 1.08)  | 0.91 (0.17, 1.66)   | 1.2 (-0.21, 2.61)   | -0.96 (-2.06, 0.12)  | 1.07 (-0.32, 2.47)  | -0.06 (-1.47, 1.35) | -0.26 (-1.66, 1.12) | 1.01 (-0.44, 2.45)  | 1.33 (0.2, 2.47)   | 0.87 (0.01, 1.71)   | 0.31 (-0.44, 1.05)  | <b>N</b>            |                     |                    |                    |                     |                |          |  |
| <b>O</b> | -0.26 (-1.64, 1.12)  | -0.05 (-1.44, 1.33) | -0.18 (-1.65, 1.28) | 0.47 (-0.97, 1.91)  | 0.76 (-1.1, 2.62)   | -1.41 (-3.05, 0.22)  | 0.63 (-1.21, 2.47)  | -0.5 (-2.36, 1.36)  | -0.71 (-2.55, 1.13) | 0.57 (-1.32, 2.44)  | 0.89 (-0.81, 2.59) | 0.42 (-1.07, 1.9)   | -0.13 (-1.56, 1.29) | -0.44 (-1.91, 1.02) | <b>O</b>            |                    |                    |                     |                |          |  |
| <b>P</b> | -0.95 (-2.22, 0.33)  | -0.74 (-2.02, 0.54) | -0.87 (-2.24, 0.5)  | -0.22 (-1.56, 1.12) | 0.07 (-1.72, 1.85)  | -2.1 (-3.64, -0.56)  | -0.06 (-1.83, 1.72) | -1.19 (-2.98, 0.59) | -1.4 (-3.16, 0.37)  | -0.12 (-1.92, 1.69) | 0.2 (-1.41, 1.81)  | -0.27 (-1.65, 1.11) | -0.82 (-2.15, 0.5)  | -1.13 (-2.5, 0.24)  | -0.69 (-2.51, 1.14) | <b>P</b>           |                    |                     |                |          |  |
| <b>Q</b> | 0.12 (-0.85, 1.08)   | 0.32 (-0.66, 1.3)   | 0.19 (-0.9, 1.28)   | 0.84 (-0.21, 1.89)  | 1.13 (-0.46, 2.72)  | -1.04 (-2.34, 0.26)  | 1 (-0.56, 2.57)     | -0.13 (-1.71, 1.45) | -0.34 (-1.9, 1.23)  | 0.94 (-0.67, 2.54)  | 1.26 (-0.13, 2.65) | 0.79 (-0.32, 1.9)   | 0.24 (-0.79, 1.26)  | -0.07 (-1.16, 1.02) | 0.37 (-1.25, 2)     | 1.06 (-0.48, 2.6)  | <b>Q</b>           |                     |                |          |  |
| <b>R</b> | 0.55 (-0.78, 1.87)   | 0.75 (-0.59, 2.09)  | 0.62 (-0.8, 2.04)   | 1.27 (-0.12, 2.66)  | 1.56 (-0.27, 3.39)  | -0.6 (-2.2, 0.98)    | 1.43 (-0.38, 3.24)  | 0.3 (-1.52, 2.12)   | 0.1 (-1.71, 1.9)    | 1.37 (-0.48, 3.21)  | 1.69 (0.03, 3.35)  | 1.23 (-0.22, 2.65)  | 0.67 (-0.71, 2.04)  | 0.36 (-1.06, 1.77)  | 0.8 (-1.06, 2.67)   | 1.49 (-0.3, 3.28)  | 0.43 (-1.15, 2.02) | <b>R</b>            |                |          |  |
| <b>S</b> | 0.11 (-1.48, 1.71)   | 0.32 (-1.29, 1.92)  | 0.19 (-1.48, 1.86)  | 0.84 (-0.81, 2.49)  | 1.13 (-0.91, 3.16)  | -1.04 (-2.86, 0.78)  | 1 (-1.02, 3.01)     | -0.13 (-2.16, 1.9)  | -0.34 (-2.35, 1.67) | 0.94 (-1.1, 2.98)   | 1.26 (-0.63, 3.14) | 0.79 (-0.89, 2.47)  | 0.24 (-1.4, 1.87)   | -0.07 (-1.74, 1.6)  | 0.37 (-1.69, 2.43)  | 1.06 (-0.93, 3.05) | 0 (-1.82, 1.81)    | -0.43 (-2.47, 1.6)  | <b>S</b>       |          |  |
| <b>T</b> | 0.11 (-1.31, 1.54)   | 0.32 (-1.11, 1.75)  | 0.19 (-1.32, 1.7)   | 0.84 (-0.64, 2.33)  | 1.13 (-0.77, 3.03)  | -1.03 (-2.71, 0.63)  | 1 (-0.88, 2.88)     | -0.13 (-2.03, 1.78) | -0.34 (-2.21, 1.54) | 0.94 (-0.98, 2.86)  | 1.26 (-0.48, 3)    | 0.79 (-0.73, 2.32)  | 0.24 (-1.23, 1.71)  | -0.07 (-1.58, 1.44) | 0.37 (-1.56, 2.31)  | 1.06 (-0.8, 2.92)  | 0 (-1.67, 1.67)    | -0.43 (-2.32, 1.47) | 0 (-2.09, 2.1) | <b>T</b> |  |

|   |                      |                      |                     |                     |                    |                      |                    |                     |                     |                     |                   |                     |                     |                      |                     |                    |                     |                      |                     |                     |   |
|---|----------------------|----------------------|---------------------|---------------------|--------------------|----------------------|--------------------|---------------------|---------------------|---------------------|-------------------|---------------------|---------------------|----------------------|---------------------|--------------------|---------------------|----------------------|---------------------|---------------------|---|
| U | -0.99 (-1.29, -0.68) | -0.78 (-1.12, -0.44) | -0.91 (-1.5, -0.32) | -0.26 (-0.78, 0.26) | 0.03 (-1.27, 1.32) | -2.13 (-3.06, -1.22) | -0.1 (-1.36, 1.17) | -1.23 (-2.52, 0.06) | -1.44 (-2.7, -0.17) | -0.16 (-1.48, 1.16) | 0.16 (-0.88, 1.2) | -0.31 (-0.93, 0.31) | -0.86 (-1.33, -0.4) | -1.17 (-1.75, -0.59) | -0.73 (-2.07, 0.61) | -0.04 (-1.28, 1.2) | -1.1 (-2.02, -0.18) | -1.53 (-2.82, -0.24) | -1.1 (-2.66, -0.47) | -1.1 (-2.49, -0.29) | U |
|---|----------------------|----------------------|---------------------|---------------------|--------------------|----------------------|--------------------|---------------------|---------------------|---------------------|-------------------|---------------------|---------------------|----------------------|---------------------|--------------------|---------------------|----------------------|---------------------|---------------------|---|

**Footnote.** Results were mean change [95% confidence interval (CrI)] from the network meta-analysis. Mean difference values less than 0 indicates that the listed intervention was better than the row intervention. **A**, *S. boulardii*; **B**, LGG; **C**, *L. reuteri*; **D**, *Bacillus clausii*; **E**, *L. acidophilus*; **F**, *B. lactis*; **G**, *L. sporogenes*; **H**, *L. plantarum*; **I**, *ECN 1917*; **J**, *L. paracasei*; **K**, *E. faecium*; **L**, *L. spp*; **M**, *L. spp* + *B. spp*; **N**, *L. spp* + *B. spp* + *S. spp*; **O**, *L. spp* + *S. spp*; **P**, *B. spp* + *S. spp*; **Q**, *Bacillus spp* + *E. spp* + *C. spp*; **R**, *L. spp* + *B. spp* + *E. spp*; **S**, *L. spp* + *B. spp* + *P. spp*; **T**, *L. spp* + *S. spp* + *C. spp* + *Bacillus spp*; **U**, Control (placebo/no treatment).

**Table S12.** NMA results for the duration of diarrhea (control = placebo)

|          |                    |                    |                    |                    |                   |                    |                   |                    |                   |                   |          |  |  |  |  |  |  |
|----------|--------------------|--------------------|--------------------|--------------------|-------------------|--------------------|-------------------|--------------------|-------------------|-------------------|----------|--|--|--|--|--|--|
| <b>A</b> | <b>A</b>           |                    |                    |                    |                   |                    |                   |                    |                   |                   |          |  |  |  |  |  |  |
| <b>B</b> | -1.02(-1.44, 0.57) | <b>B</b>           |                    |                    |                   |                    |                   |                    |                   |                   |          |  |  |  |  |  |  |
| <b>C</b> | -0.41(-1.05, 0.23) | 0.61(-0.01, 1.21)  | <b>C</b>           |                    |                   |                    |                   |                    |                   |                   |          |  |  |  |  |  |  |
| <b>D</b> | -0.99(-1.76, 0.22) | 0.03(-0.73, 0.76)  | -0.58(-1.47, 0.3)  | <b>D</b>           |                   |                    |                   |                    |                   |                   |          |  |  |  |  |  |  |
| <b>E</b> | -1.28(-2.12, 0.44) | -0.26(-1.09, 0.54) | -0.87(-1.82, 0.07) | -0.29(-1.33, 0.75) | <b>E</b>          |                    |                   |                    |                   |                   |          |  |  |  |  |  |  |
| <b>F</b> | -0.27(-1.18, 0.63) | 0.75(-0.15, 1.62)  | 0.14(-0.87, 1.14)  | 0.72(-0.37, 1.81)  | 1.01(-0.13, 2.15) | <b>F</b>           |                   |                    |                   |                   |          |  |  |  |  |  |  |
| <b>G</b> | -1.15(-1.95, 0.35) | -0.13(-0.92, 0.62) | -0.74(-1.65, 0.16) | -0.16(-1.16, 0.84) | 0.13(-0.93, 1.19) | -0.88(-1.98, 0.23) | <b>G</b>          |                    |                   |                   |          |  |  |  |  |  |  |
| <b>I</b> | 0.19(-0.61, 0.98)  | 1.21(0.43, 1.96)   | 0.6(-0.3, 1.5)     | 1.18(0.18, 2.18)   | 1.47(0.42, 2.52)  | 0.46(-0.64, 1.57)  | 1.34(0.32, 2.36)  | <b>I</b>           |                   |                   |          |  |  |  |  |  |  |
| <b>J</b> | -1.09(-1.97, 0.21) | -0.07(-0.94, 0.78) | -0.68(-1.66, 0.3)  | -0.1(-1.17, 0.98)  | 0.19(-0.93, 1.32) | -0.82(-1.98, 0.35) | 0.06(-1.03, 1.15) | -1.28(-2.36, 0.19) | <b>J</b>          |                   |          |  |  |  |  |  |  |
| <b>L</b> | -1.02(-1.55, 0.47) | 0(-0.5, 0.5)       | -0.61(-1.29, 0.09) | -0.03(-0.83, 0.8)  | 0.26(-0.6, 1.15)  | -0.75(-1.68, 0.21) | 0.13(-0.69, 0.98) | -1.21(-2.03, 0.36) | 0.07(-0.84, 1)    | <b>L</b>          |          |  |  |  |  |  |  |
| <b>M</b> | -0.46(-0.99, 0.06) | 0.56(0.06, 1.06)   | -0.05(-0.74, 0.64) | 0.53(-0.28, 1.34)  | 0.82(-0.05, 1.69) | -0.18(-1.12, 0.76) | 0.69(-0.13, 1.51) | -0.65(-1.61, 0.31) | 0.63(-0.28, 1.54) | 0.57(-0.04, 1.18) | <b>M</b> |  |  |  |  |  |  |

|          |                     |                    |                     |                    |                   |                     |                    |                     |                    |                    |                     |                     |                    |                    |                   |                    |          |
|----------|---------------------|--------------------|---------------------|--------------------|-------------------|---------------------|--------------------|---------------------|--------------------|--------------------|---------------------|---------------------|--------------------|--------------------|-------------------|--------------------|----------|
|          | 0.09)               | , 1.06)            | 0.65)               | 1.35)              | 1.71)             | 0.76)               | 1.54)              | 1.47, 0.2)          | 1.56)              | 1.15)              |                     |                     |                    |                    |                   |                    |          |
| <b>N</b> | -0.06(-0.76, 0.64)  | 0.96(0.28, 1.62)   | 0.35(-0.47, 1.17)   | 0.93(0, 1.86)      | 1.22(0.24, 2.21)  | 0.21(-0.82, 1.25)   | 1.09(0.14, 2.04)   | -0.25(-1.19, 0.7)   | 1.03(0.01, 2.05)   | 0.96(0.2, 1.7)     | 0.4(-0.35, 1.14)    | <b>N</b>            |                    |                    |                   |                    |          |
| <b>P</b> | -1.21(-1.96, -0.46) | -0.19(-0.93, 0.52) | -0.8(-1.67, 0.06)   | -0.22(-1.19, 0.74) | 0.07(-0.95, 1.09) | -0.94(-2.01, 0.14)  | -0.06(-1.04, 0.92) | -1.4(-2.38, -0.41)  | -0.12(-1.17, 0.93) | -0.19(-1, 0.59)    | -0.75(-1.55, 0.03)  | -1.15(-2.06, -0.24) | <b>P</b>           |                    |                   |                    |          |
| <b>Q</b> | -0.15(-0.97, 0.67)  | 0.87(0.06, 1.65)   | 0.26(-0.67, 1.18)   | 0.84(-0.18, 1.86)  | 1.13(0.06, 2.21)  | 0.12(-1, 1.24)      | 1(-0.04, 2.03)     | -0.34(-1.38, 0.7)   | 0.94(-0.16, 2.04)  | 0.87(-0.01, 1.71)  | 0.3(-0.56, 1.16)    | -0.09(-1.06, 0.87)  | 1.06(0.06, 2.06)   | <b>Q</b>           |                   |                    |          |
| <b>S</b> | -0.15(-1.37, 1.07)  | 0.87(-0.34, 2.06)  | 0.26(-1.04, 1.55)   | 0.84(-0.52, 2.2)   | 1.13(-0.27, 2.53) | 0.12(-1.32, 1.57)   | 1(-0.37, 2.37)     | -0.34(-1.71, 1.04)  | 0.94(-0.49, 2.38)  | 0.87(-0.39, 2.11)  | 0.31(-0.94, 1.55)   | -0.09(-1.42, 1.23)  | 1.06(-0.29, 2.41)  | 0(-1.38, 1.39)     | <b>S</b>          |                    |          |
| <b>T</b> | -0.15(-1.14, 0.84)  | 0.87(-0.11, 1.83)  | 0.26(-0.82, 1.34)   | 0.84(-0.32, 2)     | 1.13(-0.08, 2.34) | 0.12(-1.13, 1.37)   | 1(-0.18, 2.17)     | -0.34(-1.51, 0.84)  | 0.94(-0.3, 2.17)   | 0.87(-0.16, 1.88)  | 0.31(-0.72, 1.32)   | -0.09(-1.21, 1.02)  | 1.06(-0.08, 2.2)   | 0(-1.19, 1.19)     | 0(-1.49, 1.5)     | <b>T</b>           |          |
| <b>U</b> | -1.25(-1.59, -0.91) | -0.23(-0.51, 0.02) | -0.84(-1.39, -0.29) | -0.26(-0.96, 0.44) | 0.03(-0.74, 0.8)  | -0.98(-1.82, -0.14) | -0.1(-0.82, 0.62)  | -1.44(-2.16, -0.72) | -0.16(-0.98, 0.65) | -0.23(-0.67, 0.18) | -0.79(-1.22, -0.38) | -1.19(-1.81, -0.58) | -0.04(-0.71, 0.63) | -1.1(-1.84, -0.35) | -1.1(-2.27, 0.08) | -1.1(-2.03, -0.17) | <b>U</b> |

**Footnote.** Results were mean change (95% CrI) from the network meta-analysis. Mean difference values less than 0 indicates that the listed intervention was better than the row intervention. **A**, *S. boulardii*; **B**, LGG; **C**, *L. reuteri*; **D**, *Bacillus clausii*; **E**, *L. acidophilus*; **F**, *B. lactis*; **G**, *L. sporogenes*; **I**, *ECN 1917*; **J**, *L. paracasei*; **L**, *L. spp*; **M**, *L. spp* + *B. spp*; **N**, *L. spp* + *B. spp* + *S. spp*; **P**, *B. spp* + *S. spp*; **Q**, *Bacillus spp* + *E. spp* + *C. spp*; **S**, *L. spp* + *B. spp* + *P. spp*; **T**, *L. spp* + *S. spp* + *C. spp* + *Bacillus spp*; **U**, Control (placebo).

**Table S13.** NMA results for the duration of diarrhea (control = no treatment)

|          |                      |                      |                      |                    |                      |                     |                     |                      |                      |                    |                    |                      |          |
|----------|----------------------|----------------------|----------------------|--------------------|----------------------|---------------------|---------------------|----------------------|----------------------|--------------------|--------------------|----------------------|----------|
| <b>A</b> | <b>A</b>             |                      |                      |                    |                      |                     |                     |                      |                      |                    |                    |                      |          |
| <b>B</b> | 0.62 (-0.04, 1.27)   | <b>B</b>             |                      |                    |                      |                     |                     |                      |                      |                    |                    |                      |          |
| <b>C</b> | 0.03 (-0.97, 1.04)   | -0.58 (-1.68, 0.51)  | <b>C</b>             |                    |                      |                     |                     |                      |                      |                    |                    |                      |          |
| <b>D</b> | -0.64 (-1.26, -0.02) | -1.26 (-2.03, -0.49) | -0.67 (-1.78, 0.43)  | <b>D</b>           |                      |                     |                     |                      |                      |                    |                    |                      |          |
| <b>F</b> | 2.22 (0.92, 3.52)    | 1.6 (0.19, 3.01)     | 2.18 (0.58, 3.79)    | 2.86 (1.45, 4.26)  | <b>F</b>             |                     |                     |                      |                      |                    |                    |                      |          |
| <b>H</b> | 0.28 (-1.09, 1.65)   | -0.34 (-1.77, 1.09)  | 0.25 (-1.37, 1.86)   | 0.92 (-0.52, 2.36) | -1.94 (-3.78, -0.09) | <b>H</b>            |                     |                      |                      |                    |                    |                      |          |
| <b>K</b> | -0.94 (-2.04, 0.15)  | -1.55 (-2.71, -0.41) | -0.97 (-2.41, 0.45)  | -0.3 (-1.44, 0.85) | -3.16 (-4.83, -1.49) | -1.22 (-2.92, 0.48) | <b>K</b>            |                      |                      |                    |                    |                      |          |
| <b>M</b> | 0.02 (-0.69, 0.72)   | -0.6 (-1.42, 0.22)   | -0.02 (-1.13, 1.1)   | 0.66 (-0.18, 1.5)  | -2.2 (-3.63, -0.77)  | -0.26 (-1.71, 1.18) | 0.95 (-0.28, 2.19)  | <b>M</b>             |                      |                    |                    |                      |          |
| <b>N</b> | 0.31 (-0.5, 1.1)     | -0.31 (-1.2, 0.57)   | 0.28 (-0.93, 1.46)   | 0.95 (0.05, 1.83)  | -1.91 (-3.41, -0.43) | 0.03 (-1.49, 1.53)  | 1.25 (0.04, 2.44)   | 0.29 (-0.67, 1.23)   | <b>N</b>             |                    |                    |                      |          |
| <b>O</b> | -0.22 (-1.64, 1.2)   | -0.84 (-2.32, 0.64)  | -0.25 (-1.91, 1.4)   | 0.42 (-1.07, 1.9)  | -2.44 (-4.33, -0.56) | -0.5 (-2.39, 1.39)  | 0.72 (-1.02, 2.46)  | -0.24 (-1.73, 1.25)  | -0.53 (-2.07, 1.03)  | <b>O</b>           |                    |                      |          |
| <b>Q</b> | 0.15 (-1.25, 1.54)   | -0.47 (-1.93, 0.99)  | 0.12 (-1.52, 1.75)   | 0.79 (-0.68, 2.25) | -2.07 (-3.94, -0.2)  | -0.13 (-2.01, 1.75) | 1.09 (-0.64, 2.81)  | 0.13 (-1.34, 1.6)    | -0.16 (-1.69, 1.39)  | 0.37 (-1.54, 2.28) | <b>Q</b>           |                      |          |
| <b>R</b> | 0.58 (-0.8, 1.95)    | -0.04 (-1.47, 1.39)  | 0.55 (-1.07, 2.16)   | 1.22 (-0.22, 2.67) | -1.64 (-3.49, 0.21)  | 0.3 (-1.55, 2.16)   | 1.52 (-0.18, 3.22)  | 0.56 (-0.89, 2.01)   | 0.27 (-1.24, 1.8)    | 0.8 (-1.1, 2.7)    | 0.43 (-1.45, 2.31) | <b>R</b>             |          |
| <b>U</b> | -0.95 (-1.33, -0.58) | -1.57 (-2.13, -1.01) | -0.98 (-1.92, -0.04) | -0.31 (-0.9, 0.28) | -3.17 (-4.47, -1.87) | -1.23 (-2.55, 0.08) | -0.01 (-1.09, 1.06) | -0.97 (-1.57, -0.37) | -1.26 (-1.99, -0.51) | -0.73 (-2.1, 0.64) | -1.1 (-2.44, 0.24) | -1.53 (-2.85, -0.21) | <b>U</b> |

**Footnote.** Results were mean change (95% CrI) from the network meta-analysis. Mean difference values less than 0 indicates that the listed intervention was better than the row intervention. **A**, *S. boulardii*; **B**, LGG; **C**, *L. reuteri*; **D**, *Bacillus clausii*; **F**, *B. lactis*; **H**, *L. plantarum*; **K**, *E. faecium*; **M**, *L. spp + B. spp*; **N**, *L. spp + B. spp + S. spp*; **O**, *L. spp + S. spp*; **Q**, *Bacillus spp + E. spp + C. spp*; **R**, *L. spp + B. spp + E. spp*; **U**, Control (no treatment).

**Table S14.** NMA results for diarrhea lasting  $\geq 2$  days

|          |                   |                  |                   |                   |                   |                  |                 |                   |                 |                  |                  |          |
|----------|-------------------|------------------|-------------------|-------------------|-------------------|------------------|-----------------|-------------------|-----------------|------------------|------------------|----------|
| <b>A</b> | <b>A</b>          |                  |                   |                   |                   |                  |                 |                   |                 |                  |                  |          |
| <b>B</b> | 0.39(0.12, 1.20)  | <b>B</b>         |                   |                   |                   |                  |                 |                   |                 |                  |                  |          |
| <b>C</b> | 0.94(0.29, 2.9)   | 2.4(0.62, 9.1)   | <b>C</b>          |                   |                   |                  |                 |                   |                 |                  |                  |          |
| <b>D</b> | 0.67(0.047, 12.0) | 1.7(0.11, 33.0)  | 0.72(0.046, 14.0) | <b>D</b>          |                   |                  |                 |                   |                 |                  |                  |          |
| <b>E</b> | 0.26(0.031, 2.1)  | 0.67(0.072, 6.0) | 0.27(0.030, 2.5)  | 0.38(0.013, 10.0) | <b>E</b>          |                  |                 |                   |                 |                  |                  |          |
| <b>I</b> | 0.44(0.050, 3.8)  | 1.1(0.11, 11.0)  | 0.46(0.048, 4.6)  | 0.65(0.020, 18.0) | 1.7(0.095, 30.0)  | <b>I</b>         |                 |                   |                 |                  |                  |          |
| <b>L</b> | 0.21(0.027, 1.7)  | 0.55(0.061, 4.8) | 0.23(0.026, 2.0)  | 0.31(0.011, 8.1)  | 0.82(0.050, 14.0) | 0.48(0.028, 8.4) | <b>L</b>        |                   |                 |                  |                  |          |
| <b>M</b> | 1.1(0.24, 4.8)    | 2.8(0.54, 14.0)  | 1.1(0.22, 6.0)    | 1.6(0.072, 29.0)  | 4.2(0.38, 47.0)   | 2.5(0.21, 29.0)  | 5.0(0.47, 55.0) | <b>M</b>          |                 |                  |                  |          |
| <b>N</b> | 0.62(0.17, 2.3)   | 1.6(0.37, 6.9)   | 0.66(0.16, 2.9)   | 0.93(0.046, 15.0) | 2.4(0.25, 24.0)   | 1.4(0.14, 15.0)  | 2.9(0.31, 28.0) | 0.58(0.10, 3.3)   | <b>N</b>        |                  |                  |          |
| <b>O</b> | 0.82(0.088, 7.6)  | 2.1(0.20, 22.0)  | 0.87(0.086, 9.2)  | 1.2(0.037, 35.0)  | 3.2(0.17, 59.0)   | 1.9(0.096, 37.0) | 3.9(0.21, 70.0) | 0.77(0.061, 9.5)  | 1.3(0.12, 14.0) | <b>O</b>         |                  |          |
| <b>R</b> | 1.3(0.14, 13.0)   | 3.4(0.32, 36.0)  | 1.4(0.14, 15.0)   | 1.9(0.058, 56.0)  | 5.1(0.27, 97.0)   | 3.0(0.15, 61.0)  | 6.2(0.34, 200)  | 1.2(0.097, 16.0)  | 2.1(0.19, 24.0) | 1.6(0.078, 34.0) | <b>R</b>         |          |
| <b>U</b> | 0.22(0.11, 0.41)  | 0.56(0.21, 1.4)  | 0.23(0.090, 0.60) | 0.32(0.020, 4.2)  | 0.84(0.11, 6.2)   | 0.50(0.062, 4.0) | 1.0(0.14, 7.3)  | 0.20(0.052, 0.77) | 0.35(0.11, 1.0) | 0.26(0.031, 2.2) | 0.16(0.019, 1.4) | <b>U</b> |

**Footnote.** Results are Odds Ratio (95% CrI) from the network meta-analysis. Odds ratios  $< 1$  indicates that the listed intervention is better than the row intervention. **A**, *S. boulardii*; **B**, LGG; **C**, *L. reuteri*; **D**, *Bacillus clausii*; **E**, *L. acidophilus*; **I**, *ECN 1917*; **L**, *L. spp*; **M**, *L. spp* + *B. spp*; **N**, *L. spp* + *B. spp* + *S. spp*; **O**, *L. spp* + *S. spp*; **P**, *B. spp* + *S. spp*; **R**, *L. spp* + *B. spp* + *E. spp*; **U**, Control (placebo/no treatment).



**Table S15.** NMA results for the duration of hospitalization

|          |                     |                     |                     |                     |                     |                    |                     |                    |                     |          |  |  |
|----------|---------------------|---------------------|---------------------|---------------------|---------------------|--------------------|---------------------|--------------------|---------------------|----------|--|--|
| <b>A</b> | <b>A</b>            |                     |                     |                     |                     |                    |                     |                    |                     |          |  |  |
| <b>B</b> | 0.33 (-0.79, 1.46)  | <b>B</b>            |                     |                     |                     |                    |                     |                    |                     |          |  |  |
| <b>C</b> | -0.19 (-1.7, 1.32)  | -0.51 (-2.12, 1.08) | <b>C</b>            |                     |                     |                    |                     |                    |                     |          |  |  |
| <b>D</b> | -0.53 (-1.6, 0.55)  | -0.85 (-2.19, 0.48) | -0.34 (-2.01, 1.34) | <b>D</b>            |                     |                    |                     |                    |                     |          |  |  |
| <b>E</b> | -0.6 (-2.09, 0.89)  | -0.92 (-2.52, 0.66) | -0.41 (-2.29, 1.47) | -0.07 (-1.73, 1.59) | <b>E</b>            |                    |                     |                    |                     |          |  |  |
| <b>H</b> | -1.11 (-3.15, 0.94) | -1.44 (-3.55, 0.68) | -0.92 (-3.27, 1.44) | -0.58 (-2.75, 1.59) | -0.51 (-2.84, 1.82) | <b>H</b>           |                     |                    |                     |          |  |  |
| <b>L</b> | 0.22 (-1.86, 2.3)   | -0.11 (-2.27, 2.04) | 0.41 (-1.97, 2.78)  | 0.74 (-1.46, 2.96)  | 0.82 (-1.55, 3.19)  | 1.33 (-1.42, 4.08) | <b>L</b>            |                    |                     |          |  |  |
| <b>M</b> | -0.22 (-1.32, 0.87) | -0.55 (-1.78, 0.66) | -0.04 (-1.61, 1.54) | 0.3 (-1.01, 1.62)   | 0.38 (-1.19, 1.94)  | 0.89 (-1.21, 2.98) | -0.44 (-2.57, 1.69) | <b>M</b>           |                     |          |  |  |
| <b>N</b> | -0.14 (-2.21, 1.93) | -0.47 (-2.62, 1.68) | 0.05 (-2.32, 2.41)  | 0.38 (-1.81, 2.58)  | 0.46 (-1.9, 2.82)   | 0.97 (-1.78, 3.7)  | -0.36 (-3.12, 2.42) | 0.08 (-2.05, 2.21) | <b>N</b>            |          |  |  |
| <b>Q</b> | -0.42 (-1.96, 1.09) | -0.75 (-2.38, 0.85) | -0.23 (-2.15, 1.66) | 0.11 (-1.59, 1.79)  | 0.18 (-1.73, 2.07)  | 0.69 (-1.69, 3.03) | -0.64 (-3.03, 1.74) | -0.2 (-1.8, 1.39)  | -0.28 (-2.68, 2.09) | <b>Q</b> |  |  |

|          |                      |                      |                     |                     |                    |                    |                    |                    |                     |                    |                     |          |
|----------|----------------------|----------------------|---------------------|---------------------|--------------------|--------------------|--------------------|--------------------|---------------------|--------------------|---------------------|----------|
| <b>R</b> | -0.05 (-2.07, 1.98)  | -0.38 (-2.47, 1.71)  | 0.14 (-2.19, 2.47)  | 0.47 (-1.67, 2.63)  | 0.54 (-1.77, 2.87) | 1.06 (-1.64, 3.75) | -0.27 (-3, 2.47)   | 0.17 (-1.9, 2.25)  | 0.09 (-2.64, 2.81)  | 0.37 (-1.95, 2.71) | <b>R</b>            |          |
| <b>U</b> | -0.88 (-1.58, -0.18) | -1.21 (-2.09, -0.33) | -0.69 (-2.02, 0.65) | -0.35 (-1.36, 0.65) | -0.28 (-1.6, 1.04) | 0.23 (-1.69, 2.15) | -1.1 (-3.06, 0.86) | -0.65 (-1.5, 0.19) | -0.74 (-2.69, 1.22) | -0.46 (-1.8, 0.91) | -0.83 (-2.73, 1.07) | <b>U</b> |

**Footnote.** Results were mean change ( CI) from the network meta-analysis. Mean difference values less than 0 indicates that the listed intervention was better than the row intervention. **A**, *S. boulardii*; **B**, LGG; **C**, *L. reuteri*; **D**, *Bacillus clausii*; **E**, *L. acidophilus*; **H**, *L. plantarum*; **L**, *L. spp*; **M**, *L. spp* + *B. spp*; **N**, *L. spp* + *B. spp* + *S. spp*; **Q**, *Bacillus spp* + *E. spp* + *C. spp*; **R**, *L. spp* + *B. spp* + *E. spp*; **U**, Control (placebo/no treatment).

**Table S16.** NMA results for the mean stool frequency on day 2

|          |                      |                   |                    |                   |                 |                          |          |  |  |  |  |  |  |
|----------|----------------------|-------------------|--------------------|-------------------|-----------------|--------------------------|----------|--|--|--|--|--|--|
| <b>A</b> | <b>A</b>             |                   |                    |                   |                 |                          |          |  |  |  |  |  |  |
| <b>B</b> | -0.0077(-0.64, 0.67) | <b>B</b>          |                    |                   |                 |                          |          |  |  |  |  |  |  |
| <b>C</b> | 0.79(-0.15, 1.7)     | 0.80(-0.21, 1.8)  | <b>C</b>           |                   |                 |                          |          |  |  |  |  |  |  |
| <b>D</b> | -0.27(-0.91, 0.40)   | -0.26(-1.0, 0.47) | -1.1(-2.1, -0.033) | <b>D</b>          |                 |                          |          |  |  |  |  |  |  |
| <b>E</b> | -0.67(-2.6, 1.2)     | -0.66(-2.6, 1.3)  | -1.5(-3.5, 0.58)   | -0.40(-2.3, 1.9)  | <b>E</b>        |                          |          |  |  |  |  |  |  |
| <b>K</b> | -0.44(-1.5, 0.63)    | -0.43(-1.5, 0.64) | -1.2(-2.5, 0.10)   | -0.18(-1.3, 0.92) | 0.23(-1.9, 2.3) | <b>K</b>                 |          |  |  |  |  |  |  |
| <b>L</b> | -0.44(-1.4, 0.52)    | -0.44(-1.5, 0.64) | -1.2(-2.5, 0.10)   | -0.18(-1.3, 0.92) | 0.22(-1.9, 2.3) | -0.0017(-0.0034, 0.0001) | <b>L</b> |  |  |  |  |  |  |

|          |                    |                    |                   |                    |                   |                   |                   |                     |                     |                   |                   |                   |          |
|----------|--------------------|--------------------|-------------------|--------------------|-------------------|-------------------|-------------------|---------------------|---------------------|-------------------|-------------------|-------------------|----------|
|          | 0.55)              | 0.59)              | 0.0054)           | 0.88)              | 2.3)              | 1.4, 1.3)         |                   |                     |                     |                   |                   |                   |          |
| <b>M</b> | 0.12(-0.74, 1.0)   | 0.12(-0.82, 1.0)   | -0.68(-1.8, 0.48) | 0.38(-0.57, 1.4)   | 0.78(-1.2, 2.8)   | 0.56(-0.72, 1.8)  | 0.56(-0.60, 1.8)  | <b>M</b>            |                     |                   |                   |                   |          |
| <b>N</b> | 0.11(-0.71, 0.94)  | 0.12(-0.76, 0.96)  | -0.68(-1.8, 0.46) | 0.38(-0.51, 1.3)   | 0.78(-1.2, 2.8)   | 0.55(-0.60, 1.7)  | 0.55(-0.60, 1.7)  | -0.0047(-1.1, 1.1)  | <b>N</b>            |                   |                   |                   |          |
| <b>Q</b> | 0.98(-0.29, 2.3)   | 0.99(-0.35, 2.3)   | 0.19(-1.3, 1.7)   | 1.3(-0.094, 2.6)   | 1.6(-0.56, 3.9)   | 1.4(-0.16, 3.0)   | 1.4(-0.068, 3.0)  | 0.87(-0.58, 2.3)    | 0.87(-0.56, 2.3)    | <b>Q</b>          |                   |                   |          |
| <b>R</b> | 0.61(-0.80, 2.0)   | 0.61(-0.85, 2.1)   | -0.18(-1.8, 1.4)  | 0.87(-0.59, 2.3)   | 1.3(-1.0, 3.6)    | 1.1(-0.65, 2.7)   | 1.1(-0.56, 2.7)   | 0.49(-1.1, 2.0)     | 0.50(-1.0, 2.0)     | -0.38(-2.2, 1.4)  | <b>R</b>          |                   |          |
| <b>T</b> | 0.19(-1.5, 1.9)    | 0.19(-1.5, 1.9)    | -0.60(-2.4, 1.2)  | 0.45(-1.3, 2.2)    | 0.85(-1.6, 3.3)   | 0.63(-1.3, 2.6)   | 0.63(-1.2, 2.5)   | 0.069(-1.7, 1.9)    | 0.074(-1.7, 1.9)    | -0.80(-2.8, 1.2)  | -0.42(-2.5, 1.7)  | <b>T</b>          |          |
| <b>U</b> | -0.66(-1.1, -0.23) | -0.66(-1.2, -0.14) | -1.5(-2.3, -0.61) | -0.40(-0.98, 0.18) | 0.0018(-1.9, 1.9) | -0.22(-1.3, 0.80) | -0.22(-1.1, 0.70) | -0.78(-1.6, -0.021) | -0.77(-1.5, -0.014) | -1.6(-2.9, -0.44) | -1.3(-2.6, 0.073) | -0.85(-2.5, 0.77) | <b>U</b> |

**Footnote.** Results were mean change (95% CrI) from the network meta-analysis. Mean difference values less than 0 indicates that the listed intervention was better than the row intervention. **A**, *S. boulardii*; **B**, LGG; **C**, *L. reuteri*; **D**, *Bacillus clausii*; **E**, *L. acidophilus*; **K**, *E. faecium*; **L**, *L. spp*; **M**, *L. spp* + *B. spp*; **N**, *L. spp* + *B. spp* + *S. spp*; **Q**, *Bacillus spp* + *E. spp* + *C. spp*; **R**, *L. spp* + *B. spp* + *E. spp*; **T**, *L. spp* + *S. spp* + *C. spp* + *Bacillus spp*; **U**, Control (placebo/no treatment).

**Table S17.** NMA results for the duration of vomiting

|          |                     |                     |                     |                     |                    |                     |                     |                      |                    |          |  |  |
|----------|---------------------|---------------------|---------------------|---------------------|--------------------|---------------------|---------------------|----------------------|--------------------|----------|--|--|
| <b>A</b> | <b>A</b>            |                     |                     |                     |                    |                     |                     |                      |                    |          |  |  |
| <b>B</b> | 0.09 (-0.23, 0.44)  | <b>B</b>            |                     |                     |                    |                     |                     |                      |                    |          |  |  |
| <b>D</b> | 0.05 (-0.46, 0.57)  | -0.04 (-0.56, 0.47) | <b>D</b>            |                     |                    |                     |                     |                      |                    |          |  |  |
| <b>H</b> | 0.01 (-0.78, 0.82)  | -0.08 (-0.88, 0.72) | -0.04 (-0.95, 0.87) | <b>H</b>            |                    |                     |                     |                      |                    |          |  |  |
| <b>K</b> | 0.05 (-0.45, 0.56)  | -0.04 (-0.55, 0.46) | 0 (-0.58, 0.58)     | 0.04 (-0.86, 0.94)  | <b>K</b>           |                     |                     |                      |                    |          |  |  |
| <b>L</b> | 0.17 (-0.43, 0.78)  | 0.08 (-0.53, 0.68)  | 0.12 (-0.62, 0.86)  | 0.16 (-0.78, 1.1)   | 0.12 (-0.61, 0.85) | <b>L</b>            |                     |                      |                    |          |  |  |
| <b>N</b> | 0.19 (-0.31, 0.71)  | 0.1 (-0.41, 0.6)    | 0.14 (-0.44, 0.72)  | 0.18 (-0.73, 1.08)  | 0.14 (-0.43, 0.71) | 0.02 (-0.71, 0.75)  | <b>N</b>            |                      |                    |          |  |  |
| <b>Q</b> | 0.56 (0, 1.15)      | 0.47 (-0.11, 1.04)  | 0.51 (-0.21, 1.23)  | 0.55 (-0.37, 1.47)  | 0.51 (-0.2, 1.22)  | 0.39 (-0.36, 1.15)  | 0.37 (-0.34, 1.08)  | <b>Q</b>             |                    |          |  |  |
| <b>S</b> | 1.14 (-0.2, 2.47)   | 1.04 (-0.29, 2.37)  | 1.09 (-0.31, 2.48)  | 1.13 (-0.4, 2.64)   | 1.09 (-0.31, 2.48) | 0.96 (-0.45, 2.39)  | 0.94 (-0.45, 2.33)  | 0.57 (-0.84, 1.98)   | <b>S</b>           |          |  |  |
| <b>U</b> | -0.07 (-0.31, 0.19) | -0.16 (-0.42, 0.09) | -0.12 (-0.61, 0.38) | -0.08 (-0.84, 0.68) | -0.12 (-0.6, 0.36) | -0.24 (-0.79, 0.31) | -0.26 (-0.75, 0.23) | -0.63 (-1.15, -0.11) | -1.2 (-2.51, 0.11) | <b>U</b> |  |  |

**Footnote.** Results were mean change (95% CrI) from the network meta-analysis. Mean difference values less than 0 indicates that the listed intervention was better than the row intervention. **A**, *S. boulardii*; **B**, LGG; **D**, *Bacillus clausii*; **H**, *L. plantarum*; **K**, *E. faecium*; **L**, *L. spp*; **N**, *L. spp* + *B. spp* + *S. spp*; **Q**, *Bacillus spp* + *E. spp* + *C. spp*; **S**, *L. spp* + *B. spp* + *P. spp*; **U**, Control (placebo/no treatment).

**Table S18.** NMA results for the duration of fever

|          |                     |                     |                    |                     |                     |                    |                     |                     |                     |                     |                    |          |  |  |  |  |
|----------|---------------------|---------------------|--------------------|---------------------|---------------------|--------------------|---------------------|---------------------|---------------------|---------------------|--------------------|----------|--|--|--|--|
| <b>A</b> | <b>A</b>            |                     |                    |                     |                     |                    |                     |                     |                     |                     |                    |          |  |  |  |  |
| <b>B</b> | 0.37 (-0.29, 1.02)  | <b>B</b>            |                    |                     |                     |                    |                     |                     |                     |                     |                    |          |  |  |  |  |
| <b>D</b> | -0.09 (-0.55, 0.36) | -0.46 (-1.17, 0.25) | <b>D</b>           |                     |                     |                    |                     |                     |                     |                     |                    |          |  |  |  |  |
| <b>F</b> | 0.33 (-0.52, 1.19)  | -0.04 (-1.05, 0.99) | 0.42 (-0.46, 1.32) | <b>F</b>            |                     |                    |                     |                     |                     |                     |                    |          |  |  |  |  |
| <b>H</b> | 0.05 (-1.85, 1.97)  | -0.32 (-2.3, 1.68)  | 0.14 (-1.78, 2.08) | -0.29 (-2.31, 1.76) | <b>H</b>            |                    |                     |                     |                     |                     |                    |          |  |  |  |  |
| <b>K</b> | -0.27 (-1.05, 0.5)  | -0.64 (-1.51, 0.24) | -0.18 (-1, 0.64)   | -0.6 (-1.71, 0.49)  | -0.32 (-2.36, 1.71) | <b>K</b>           |                     |                     |                     |                     |                    |          |  |  |  |  |
| <b>L</b> | 0.02 (-1.12, 1.16)  | -0.35 (-1.61, 0.92) | 0.11 (-1.05, 1.27) | -0.31 (-1.65, 1.02) | -0.03 (-2.2, 2.14)  | 0.29 (-1.04, 1.63) | <b>L</b>            |                     |                     |                     |                    |          |  |  |  |  |
| <b>M</b> | 0.47 (-0.63, 1.58)  | 0.1 (-1.13, 1.34)   | 0.56 (-0.56, 1.7)  | 0.14 (-1.17, 1.45)  | 0.42 (-1.74, 2.57)  | 0.74 (-0.56, 2.05) | 0.45 (-1.06, 1.97)  | <b>M</b>            |                     |                     |                    |          |  |  |  |  |
| <b>N</b> | -0.06 (-0.69, 0.57) | -0.43 (-1.22, 0.37) | 0.03 (-0.64, 0.71) | -0.4 (-1.38, 0.59)  | -0.11 (-2.1, 1.85)  | 0.21 (-0.68, 1.11) | -0.08 (-1.31, 1.16) | -0.53 (-1.74, 0.67) | <b>N</b>            |                     |                    |          |  |  |  |  |
| <b>Q</b> | -0.06 (-0.72, 0.56) | -0.44 (-1.29, 0.41) | 0.02 (-0.67, 0.7)  | -0.4 (-1.37, 0.54)  | -0.11 (-2.08, 1.83) | 0.2 (-0.75, 1.14)  | -0.08 (-1.3, 1.12)  | -0.54 (-1.73, 0.64) | 0 (-0.82, 0.78)     | <b>Q</b>            |                    |          |  |  |  |  |
| <b>S</b> | 0.31 (-1.19, 1.81)  | -0.06 (-1.65, 1.54) | 0.4 (-1.12, 1.93)  | -0.02 (-1.68, 1.64) | 0.26 (-2.13, 2.65)  | 0.58 (-1.07, 2.24) | 0.29 (-1.54, 2.14)  | -0.16 (-1.96, 1.65) | 0.37 (-1.21, 1.95)  | 0.38 (-1.18, 1.95)  | <b>S</b>           |          |  |  |  |  |
| <b>U</b> | -0.18 (-0.53, 0.16) | -0.56 (-1.2, 0.11)  | -0.1 (-0.5, 0.33)  | -0.52 (-1.3, 0.27)  | -0.23 (-2.13, 1.64) | 0.08 (-0.68, 0.86) | -0.2 (-1.29, 0.89)  | -0.66 (-1.7, 0.39)  | -0.12 (-0.71, 0.47) | -0.12 (-0.65, 0.44) | -0.5 (-1.97, 0.97) | <b>U</b> |  |  |  |  |

**Footnote.** Results were mean change (95% CrI) from the network meta-analysis. Mean difference values less than 0 indicates that the listed intervention was better than the row intervention. **A**, *S. boulardii*; **B**, LGG; **D**, *Bacillus clausii*; **F**, *B. lactis*; **H**, *L. plantarum*; **K**, *E. faecium*; **L**, *L. spp*; **M**, *L. spp* + *B. spp*; **N**, *L. spp* + *B. spp* + *S. spp*; **Q**, *Bacillus spp* + *E. spp* + *C. spp*; **S**, *L. spp* + *B. spp* + *P. spp*; **U**, Control (placebo/no treatment).

**Table S19.** Certainty of evidence for the duration of diarrhea

| Comparison | N of trials | Certainty of evidence | Imprecision  | Indirectness | Inconsistency | Overall risk of bias |
|------------|-------------|-----------------------|--------------|--------------|---------------|----------------------|
| A vs B     | 1           | Very low              | Serious      | Serious      | Very serious  | Not serious          |
| A vs D     | 3           | Moderate              | Serious      | Not serious  | Not serious   | Not serious          |
| A vs F     | 1           | Very low              | Serious      | Serious      | Very serious  | Serious              |
| A vs K     | 1           | Moderate              | Serious      | Not serious  | Not serious   | Not serious          |
| A vs N     | 1           | Moderate              | Serious      | Not serious  | Not serious   | Not serious          |
| A vs U     | 20          | Low                   | Not serious  | Not serious  | Serious       | Serious              |
| B vs D     | 1           | Moderate              | Serious      | Not serious  | Not serious   | Not serious          |
| B vs K     | 1           | Moderate              | Serious      | Not serious  | Not serious   | Not serious          |
| B vs N     | 1           | Moderate              | Serious      | Not serious  | Not serious   | Not serious          |
| B vs U     | 15          | Low                   | Not serious  | Not serious  | Serious       | Serious              |
| C vs U     | 6           | Moderate              | Not serious  | Not serious  | Not serious   | Serious              |
| D vs K     | 1           | Moderate              | Serious      | Not serious  | Not serious   | Not serious          |
| D vs N     | 1           | Moderate              | Serious      | Not serious  | Not serious   | Not serious          |
| D vs U     | 4           | Low                   | Not serious  | Not serious  | Serious       | Serious              |
| E vs U     | 1           | Moderate              | Serious      | Not serious  | Not serious   | Not serious          |
| F vs U     | 2           | Low                   | Serious      | Not serious  | Serious       | Not serious          |
| G vs U     | 1           | Moderate              | Serious      | Not serious  | Not serious   | Not serious          |
| H vs U     | 1           | Low                   | Serious      | Not serious  | Not serious   | Serious              |
| I vs U     | 1           | Very low              | Very serious | Not serious  | Not serious   | Serious              |
| J vs U     | 1           | Moderate              | Serious      | Not serious  | Not serious   | Not serious          |
| K vs N     | 1           | Moderate              | Serious      | Not serious  | Not serious   | Not serious          |
| K vs U     | 1           | Moderate              | Serious      | Not serious  | Not serious   | Not serious          |
| L vs U     | 6           | High                  | Not serious  | Not serious  | Not serious   | Not serious          |
| M vs U     | 8           | Low                   | Not serious  | Not serious  | Serious       | Serious              |
| N vs U     | 5           | Moderate              | Not serious  | Not serious  | Not serious   | Serious              |
| O vs U     | 1           | Low                   | Serious      | Not serious  | Not serious   | Serious              |
| P vs U     | 1           | Low                   | Serious      | Not serious  | Not serious   | Serious              |
| Q vs U     | 2           | Low                   | Serious      | Not serious  | Not serious   | Serious              |
| R vs U     | 1           | Low                   | Serious      | Not serious  | Not serious   | Serious              |
| S vs U     | 1           | Low                   | Serious      | Not serious  | Not serious   | Serious              |
| T vs U     | 1           | Low                   | Serious      | Not serious  | Not serious   | Serious              |

**Footnote.** A, *S. boulardii*; B, LGG; C, *L. reuteri*; D, *Bacillus clausii*; E, *L. acidophilus*; F, *B. lactis*; G, *L. sporogenes*; H, *L. plantarum*; I, ECN 1917; J, *L. paracasei*; K, *E. faecium*; L, *L. spp*; M, *L. spp* + *B. spp*; N, *L. spp* + *B. spp* + *S. spp*; O, *L. spp* + *S. spp*; P, *B. spp* + *S. spp*; Q, *Bacillus spp* + *E. spp* + *C. spp*; R, *L. spp* + *B. spp* + *E. spp*; S, *L. spp* + *B. spp* + *P. spp*; T, *L. spp* + *S. spp* + *C. spp* + *Bacillus spp*; U,

Control (placebo/no treatment).

**Table S20.** Certainty of evidence for the duration of diarrhea (control = placebo)

| Comparison | N of trials | Certainty of evidence | Imprecision  | Indirectness | Inconsistency | Overall risk of bias |
|------------|-------------|-----------------------|--------------|--------------|---------------|----------------------|
| A vs U     | 6           | Moderate              | Not serious  | Not serious  | Serious       | Not serious          |
| B vs U     | 10          | Moderate              | Not serious  | Not serious  | Serious       | Not serious          |
| C vs U     | 4           | Moderate              | Serious      | Not serious  | Not serious   | Not serious          |
| D vs U     | 1           | Moderate              | Serious      | Not serious  | Not serious   | Not serious          |
| E vs U     | 1           | Moderate              | Serious      | Not serious  | Not serious   | Not serious          |
| F vs U     | 1           | Moderate              | Serious      | Not serious  | Not serious   | Not serious          |
| G vs U     | 1           | Moderate              | Serious      | Not serious  | Not serious   | Not serious          |
| I vs U     | 1           | Very low              | Very serious | Not serious  | Not serious   | Serious              |
| J vs U     | 1           | Moderate              | Serious      | Not serious  | Not serious   | Not serious          |
| L vs U     | 6           | High                  | Not serious  | Not serious  | Not serious   | Not serious          |
| M vs U     | 4           | Low                   | Serious      | Not serious  | Serious       | Not serious          |
| N vs U     | 2           | Moderate              | Serious      | Not serious  | Not serious   | Not serious          |
| P vs U     | 1           | Low                   | Serious      | Not serious  | Not serious   | Serious              |
| Q vs U     | 1           | Moderate              | Serious      | Not serious  | Not serious   | Not serious          |
| S vs U     | 1           | Low                   | Serious      | Not serious  | Not serious   | Serious              |
| T vs U     | 1           | Low                   | Serious      | Not serious  | Not serious   | Serious              |

**Footnote.** A, *S. boulardii*; B, LGG; C, *L. reuteri*; D, *Bacillus clausii*; E, *L. acidophilus*; F, *B. lactis*; G, *L. sporogenes*; I, ECN 1917; J, *L. paracasei*; L, *L. spp*; M, *L. spp* + *B. spp*; N, *L. spp* + *B. spp* + *S. spp*; P, *B. spp* + *S. spp*; Q, *Bacillus spp* + *E. spp* + *C. spp*; S, *L. spp* + *B. spp* + *P. spp*; T, *L. spp* + *S. spp* + *C. spp* + *Bacillus spp*; U, Control (placebo).

**Table S21.** Certainty of evidence for the duration of diarrhea (control = no treatment)

| Comparison | N of trials | Certainty of evidence | Imprecision | Indirectness | Inconsistency | Overall risk of bias |
|------------|-------------|-----------------------|-------------|--------------|---------------|----------------------|
| A vs B     | 1           | Moderate              | Serious     | Not serious  | Not serious   | Not serious          |
| A vs D     | 3           | Moderate              | Serious     | Not serious  | Not serious   | Not serious          |
| A vs F     | 1           | Low                   | Serious     | Not serious  | Not serious   | Serious              |
| A vs K     | 1           | Moderate              | Serious     | Not serious  | Not serious   | Not serious          |
| A vs N     | 1           | Moderate              | Serious     | Not serious  | Not serious   | Not serious          |
| A vs U     | 14          | Low                   | Not serious | Not serious  | Serious       | Serious              |
| B vs D     | 1           | Moderate              | Serious     | Not serious  | Not serious   | Not serious          |
| B vs K     | 1           | Moderate              | Serious     | Not serious  | Not serious   | Not serious          |
| B vs N     | 1           | Moderate              | Serious     | Not serious  | Not serious   | Not serious          |
| B vs U     | 5           | Low                   | Not serious | Not serious  | Serious       | Serious              |

|        |   |          |             |             |             |             |
|--------|---|----------|-------------|-------------|-------------|-------------|
| C vs U | 2 | Low      | Serious     | Not serious | Serious     | Not serious |
| D vs K | 1 | Moderate | Serious     | Not serious | Not serious | Not serious |
| D vs N | 1 | Moderate | Serious     | Not serious | Not serious | Not serious |
| D vs U | 2 | Low      | Serious     | Not serious | Serious     | Not serious |
| F vs U | 1 | Low      | Serious     | Not serious | Not serious | Serious     |
| H vs U | 1 | Low      | Serious     | Not serious | Not serious | Serious     |
| K vs N | 1 | Moderate | Serious     | Not serious | Not serious | Not serious |
| K vs U | 1 | Moderate | Serious     | Not serious | Not serious | Not serious |
| M vs U | 4 | Low      | Not serious | Not serious | Serious     | Serious     |
| N vs U | 3 | Very low | Serious     | Not serious | Serious     | Serious     |
| O vs U | 1 | Low      | Serious     | Not serious | Not serious | Serious     |
| Q vs U | 1 | Low      | Serious     | Not serious | Not serious | Serious     |
| R vs U | 1 | Low      | Serious     | Not serious | Not serious | Serious     |

**Footnote.** **A**, *S. boulardii*; **B**, LGG; **C**, *L. reuteri*; **D**, *Bacillus clausii*; **F**, *B. lactis*; **H**, *L. plantarum*; **K**, *E. faecium*; **M**, *L. spp* + *B. spp*; **N**, *L. spp* + *B. spp* + *S. spp*; **O**, *L. spp* + *S. spp*; **Q**, *Bacillus spp* + *E. spp* + *C. spp*; **R**, *L. spp* + *B. spp* + *E. spp*; **U**, Control (no treatment).



**Table S22.** Certainty of evidence for diarrhea lasting  $\geq 2$  days

| Comparison | N of trials | Certainty of evidence | Imprecision  | Indirectness | Inconsistency | Overall risk of bias |
|------------|-------------|-----------------------|--------------|--------------|---------------|----------------------|
| A vs U     | 12          | Moderate              | Not serious  | Not serious  | Serious       | Not serious          |
| B vs U     | 5           | Low                   | Serious      | Not serious  | Serious       | Not serious          |
| C vs U     | 6           | Moderate              | Not serious  | Not serious  | Serious       | Not serious          |
| D vs U     | 1           | Low                   | Very serious | Not serious  | Not serious   | Not serious          |
| E vs U     | 1           | Low                   | Very serious | Not serious  | Not serious   | Not serious          |
| I vs U     | 1           | Very low              | Very serious | Not serious  | Not serious   | Serious              |
| L vs U     | 1           | Moderate              | Serious      | Not serious  | Not serious   | Not serious          |
| M vs U     | 3           | Low                   | Serious      | Not serious  | Not serious   | Serious              |
| N vs U     | 4           | Low                   | Serious      | Not serious  | Not serious   | Serious              |
| O vs U     | 1           | Very low              | Very serious | Not serious  | Not serious   | Serious              |
| R vs U     | 1           | Very low              | Very serious | Not serious  | Not serious   | Serious              |

**Footnote.** **A**, *S. boulardii*; **B**, LGG; **C**, *L. reuteri*; **D**, *Bacillus clausii*; **E**, *L. acidophilus*; **I**, ECN 1917; **L**, *L. spp*; **M**, *L. spp* + *B. spp*; **N**, *L. spp* + *B. spp* + *S. spp*; **O**, *L. spp* + *S. spp*; **P**, *B. spp* + *S. spp*; **R**, *L. spp* + *B. spp* + *E. spp*; **U**, Control (placebo/no treatment).

**Table S23.** Certainty of evidence for the duration of hospitalization

| Comparison | N of trials | Certainty of evidence | Imprecision | Indirectness | Inconsistency | Overall risk of bias |
|------------|-------------|-----------------------|-------------|--------------|---------------|----------------------|
| A vs D     | 1           | Moderate              | Serious     | Not serious  | Not serious   | Not serious          |
| A vs U     | 7           | Low                   | Not serious | Not serious  | Serious       | Serious              |
| B vs U     | 5           | Low                   | Not serious | Not serious  | Serious       | Serious              |
| C vs U     | 2           | Low                   | Serious     | Not serious  | Serious       | Not serious          |
| D vs U     | 3           | Low                   | Not serious | Not serious  | Serious       | Serious              |
| E vs U     | 2           | Low                   | Serious     | Not serious  | Serious       | Not serious          |
| F vs U     | 1           | Low                   | Serious     | Not serious  | Not serious   | Serious              |
| H vs U     | 1           | Low                   | Serious     | Not serious  | Not serious   | Serious              |
| L vs U     | 1           | Low                   | Serious     | Not serious  | Not serious   | Serious              |
| M vs U     | 5           | Low                   | Not serious | Not serious  | Serious       | Serious              |
| N vs U     | 1           | Low                   | Serious     | Not serious  | Not serious   | Serious              |
| Q vs U     | 2           | Low                   | Serious     | Not serious  | Serious       | Not serious          |
| R vs U     | 1           | Low                   | Serious     | Not serious  | Not serious   | Serious              |

**Footnote.** A, *S. boulardii*; B, LGG; C, *L. reuteri*; D, *Bacillus clausii*; E, *L. acidophilus*; H, *L. plantarum*; L, *L. spp*; M, *L. spp* + *B. spp*; N, *L. spp* + *B. spp* + *S. spp*; Q, *Bacillus spp* + *E. spp* + *C. spp*; R, *L. spp* + *B. spp* + *E. spp*; U, Control (placebo/no treatment).

**Table S24.** Certainty of evidence for the mean stool frequency on day 2

| Comparison | N of trials | Certainty of evidence | Imprecision | Indirectness | Inconsistency | Overall risk of bias |
|------------|-------------|-----------------------|-------------|--------------|---------------|----------------------|
| A vs B     | 1           | Moderate              | Serious     | Not serious  | Not serious   | Not serious          |
| A vs D     | 2           | Low                   | Serious     | Not serious  | Not serious   | Serious              |
| A vs K     | 1           | Moderate              | Serious     | Not serious  | Not serious   | Not serious          |
| A vs N     | 1           | Moderate              | Serious     | Not serious  | Not serious   | Not serious          |
| A vs U     | 9           | Moderate              | Not serious | Not serious  | Serious       | Not serious          |
| B vs D     | 1           | Moderate              | Serious     | Not serious  | Not serious   | Not serious          |
| B vs K     | 1           | Moderate              | Serious     | Not serious  | Not serious   | Not serious          |
| B vs N     | 1           | Moderate              | Serious     | Not serious  | Not serious   | Not serious          |
| B vs U     | 7           | Moderate              | Not serious | Not serious  | Serious       | Not serious          |
| C vs U     | 4           | Moderate              | Serious     | Not serious  | Not serious   | Not serious          |
| D vs K     | 1           | Moderate              | Serious     | Not serious  | Not serious   | Not serious          |
| D vs U     | 4           | High                  | Not serious | Not serious  | Not serious   | Not serious          |
| D vs N     | 1           | Moderate              | Serious     | Not serious  | Not serious   | Not serious          |
| E vs U     | 1           | Low                   | Serious     | Not serious  | Not serious   | Serious              |
| K vs N     | 1           | Moderate              | Serious     | Not serious  | Not serious   | Not serious          |
| K vs U     | 1           | Moderate              | Serious     | Not serious  | Not serious   | Not serious          |
| L vs U     | 2           | Low                   | Serious     | Not serious  | Serious       | Not serious          |
| M vs U     | 3           | Very low              | Serious     | Not serious  | Serious       | Serious              |
| N vs U     | 3           | Moderate              | Serious     | Not serious  | Not serious   | Not serious          |
| Q vs U     | 1           | Moderate              | Serious     | Not serious  | Not serious   | Not serious          |
| R vs U     | 1           | Low                   | Serious     | Not serious  | Not serious   | Serious              |
| T vs U     | 1           | Low                   | Serious     | Not serious  | Not serious   | Serious              |

**Footnote.** A, *S. boulardii*; B, LGG; C, *L. reuteri*; D, *Bacillus clausii*; E, *L. acidophilus*; K, *E. faecium*; L, *L. spp*; M, *L. spp* + *B. spp*; N, *L. spp* + *B. spp* + *S. spp*; Q, *Bacillus spp* + *E. spp* + *C. spp*; R, *L. spp* + *B. spp* + *E. spp*; T, *L. spp* + *S. spp* + *C. spp* + *Bacillus spp*; U, Control (placebo/no treatment).

**Table S25.** Certainty of evidence for the duration of vomiting

| Comparison | N of trials | Certainty of evidence | Imprecision | Indirectness | Inconsistency | Overall risk of bias |
|------------|-------------|-----------------------|-------------|--------------|---------------|----------------------|
| A vs B     | 1           | Moderate              | Serious     | Not serious  | Not serious   | Not serious          |
| A vs D     | 1           | Moderate              | Serious     | Not serious  | Not serious   | Not serious          |
| A vs K     | 1           | Moderate              | Serious     | Not serious  | Not serious   | Not serious          |
| A vs N     | 1           | Moderate              | Serious     | Not serious  | Not serious   | Not serious          |
| A vs U     | 4           | Moderate              | Not serious | Not serious  | Serious       | Not serious          |
| B vs D     | 1           | Moderate              | Serious     | Not serious  | Not serious   | Not serious          |
| B vs K     | 1           | Moderate              | Serious     | Not serious  | Not serious   | Not serious          |
| B vs N     | 1           | Moderate              | Serious     | Not serious  | Not serious   | Not serious          |
| B vs U     | 4           | High                  | Not serious | Not serious  | Not serious   | Not serious          |
| D vs K     | 1           | Moderate              | Serious     | Not serious  | Not serious   | Not serious          |
| D vs N     | 1           | Moderate              | Serious     | Not serious  | Not serious   | Not serious          |
| D vs U     | 1           | Moderate              | Serious     | Not serious  | Not serious   | Not serious          |
| H vs U     | 1           | Low                   | Serious     | Not serious  | Not serious   | Serious              |
| K vs N     | 1           | Moderate              | Serious     | Not serious  | Not serious   | Not serious          |
| K vs U     | 1           | Moderate              | Serious     | Not serious  | Not serious   | Not serious          |
| L vs U     | 2           | Moderate              | Serious     | Not serious  | Not serious   | Not serious          |
| N vs U     | 1           | Moderate              | Serious     | Not serious  | Not serious   | Not serious          |
| Q vs U     | 1           | Moderate              | Serious     | Not serious  | Not serious   | Not serious          |
| S vs U     | 1           | Low                   | Serious     | Not serious  | Not serious   | Serious              |

**Footnote.** A, *S. boulardii*; B, LGG; D, *Bacillus clausii*; H, *L. plantarum*; K, *E. faecium*; L, *L. spp*; N, *L. spp* + *B. spp* + *S. spp*; Q, *Bacillus spp* + *E. spp* + *C. spp*; S, *L. spp* + *B. spp* + *P. spp*; U, Control (placebo/no treatment).

**Table S26.** Certainty of evidence for the duration of fever

| Comparison | N of trials | Certainty of evidence | Imprecision | Indirectness | Inconsistency | Overall risk of bias |
|------------|-------------|-----------------------|-------------|--------------|---------------|----------------------|
| A vs B     | 1           | Moderate              | Serious     | Not serious  | Not serious   | Not serious          |
| A vs D     | 2           | Moderate              | Serious     | Not serious  | Not serious   | Not serious          |
| A vs K     | 1           | Moderate              | Serious     | Not serious  | Not serious   | Not serious          |
| A vs N     | 1           | Moderate              | Serious     | Not serious  | Not serious   | Not serious          |
| A vs U     | 4           | Low                   | Not serious | Not serious  | Serious       | Serious              |
| B vs D     | 1           | Moderate              | Serious     | Not serious  | Not serious   | Not serious          |
| B vs K     | 1           | Moderate              | Serious     | Not serious  | Not serious   | Not serious          |
| B vs N     | 1           | Moderate              | Serious     | Not serious  | Not serious   | Not serious          |
| B vs U     | 1           | Moderate              | Serious     | Not serious  | Not serious   | Not serious          |
| D vs K     | 1           | Moderate              | Serious     | Not serious  | Not serious   | Not serious          |
| D vs N     | 1           | Moderate              | Serious     | Not serious  | Not serious   | Not serious          |
| D vs U     | 3           | Moderate              | Serious     | Not serious  | Not serious   | Not serious          |
| F vs U     | 1           | Low                   | Serious     | Not serious  | Not serious   | Serious              |
| H vs U     | 1           | Low                   | Serious     | Not serious  | Not serious   | Serious              |
| K vs N     | 1           | Moderate              | Serious     | Not serious  | Not serious   | Not serious          |
| K vs U     | 1           | Moderate              | Serious     | Not serious  | Not serious   | Not serious          |
| L vs U     | 1           | Low                   | Serious     | Not serious  | Not serious   | Serious              |
| M vs U     | 1           | Low                   | Serious     | Not serious  | Not serious   | Serious              |
| N vs U     | 2           | Moderate              | Serious     | Not serious  | Not serious   | Not serious          |
| Q vs U     | 2           | Moderate              | Not serious | Not serious  | Serious       | Not serious          |
| S vs U     | 1           | Low                   | Serious     | Not serious  | Not serious   | Serious              |

**Footnote.** A, *S. boulardii*; B, LGG; D, *Bacillus clausii*; F, *B. lactis*; H, *L. plantarum*; K, *E. faecium*; L, *L. spp*; M, *L. spp* + *B. spp*; N, *L. spp* + *B. spp* + *S. spp*; Q, *Bacillus spp* + *E. spp* + *C. spp*; S, *L. spp* + *B. spp* + *P. spp*; U, Control (placebo/no treatment).

**Table S27.** Rank for outcomes

| Intervention                                  | Duration of diarrhea |           | Duration of diarrhea (control= placebo) |           | Duration of diarrhea (control= no treatment) |           | Diarrhea lasting $\geq 2$ Days |           | Duration of hospitalization |           | Mean stool frequency on day 2 |           | Duration of vomiting |          | Duration of fever |           |
|-----------------------------------------------|----------------------|-----------|-----------------------------------------|-----------|----------------------------------------------|-----------|--------------------------------|-----------|-----------------------------|-----------|-------------------------------|-----------|----------------------|----------|-------------------|-----------|
|                                               | SUCRA                | Rank      | SUCRA                                   | Rank      | SUCRA                                        | Rank      | SUCRA                          | Rank      | SUCRA                       | Rank      | SUCRA                         | Rank      | SUCRA                | Rank     | SUCRA             | Rank      |
| <i>S. boulardii</i>                           | 0.636                | <b>8</b>  | 0.831                                   | <b>2</b>  | 0.475                                        | <b>9</b>  | 0.721                          | <b>3</b>  | 0.659                       | <b>3</b>  | 0.515                         | <b>7</b>  | 0.320                | <b>9</b> | 0.481             | <b>6</b>  |
| LGG                                           | 0.515                | <b>12</b> | 0.303                                   | <b>11</b> | 0.779                                        | <b>2</b>  | 0.361                          | <b>9</b>  | 0.789                       | <b>1</b>  | 0.510                         | <b>8</b>  | 0.467                | <b>5</b> | 0.751             | <b>1</b>  |
| <i>L. reuteri</i>                             | 0.589                | <b>10</b> | 0.619                                   | <b>8</b>  | 0.498                                        | <b>7</b>  | 0.689                          | <b>4</b>  | 0.550                       | <b>6</b>  | 0.852                         | <b>2</b>  | -                    | -        | -                 | -         |
| <i>Bacillus clausii</i>                       | 0.271                | <b>16</b> | 0.315                                   | <b>10</b> | 0.195                                        | <b>11</b> | 0.549                          | <b>6</b>  | 0.390                       | <b>9</b>  | 0.357                         | <b>9</b>  | 0.394                | <b>7</b> | 0.383             | <b>10</b> |
| <i>L. acidophilus</i>                         | 0.210                | <b>20</b> | 0.168                                   | <b>16</b> | -                                            | -         | 0.272                          | <b>10</b> | 0.372                       | <b>10</b> | 0.261                         | <b>12</b> | -                    | -        | -                 | -         |
| <i>B. lactis</i>                              | 0.951                | <b>1</b>  | 0.682                                   | <b>7</b>  | 0.991                                        | <b>1</b>  | -                              | -         | -                           | -         | -                             | -         | -                    | -        | 0.703             | <b>3</b>  |
| <i>L. sporogenes</i>                          | 0.249                | <b>17</b> | 0.228                                   | <b>13</b> | -                                            | -         | -                              | -         | -                           | -         | -                             | -         | -                    | -        | -                 | -         |
| <i>L. plantarum</i>                           | 0.695                | <b>5</b>  | -                                       | -         | 0.597                                        | <b>5</b>  | -                              | -         | 0.230                       | <b>11</b> | -                             | -         | 0.370                | <b>8</b> | 0.493             | <b>5</b>  |
| <i>ECN 1917</i>                               | 0.768                | <b>3</b>  | 0.886                                   | <b>1</b>  | -                                            | -         | 0.425                          | <b>8</b>  | -                           | -         | -                             | -         | -                    | -        | -                 | -         |
| <i>L. paracasei</i>                           | 0.275                | <b>15</b> | 0.264                                   | <b>14</b> | -                                            | -         | -                              | -         | -                           | -         | -                             | -         | -                    | -        | -                 | -         |
| <i>E. faecium</i>                             | 0.150                | <b>22</b> | -                                       | -         | 0.120                                        | <b>12</b> | -                              | -         | -                           | -         | 0.277                         | <b>10</b> | 0.395                | <b>6</b> | 0.263             |           |
| <i>L. spp</i>                                 | 0.294                | <b>14</b> | 0.296                                   | <b>12</b> | -                                            | -         | 0.220                          | <b>11</b> | 0.678                       | <b>2</b>  | 0.271                         | <b>11</b> | 0.527                | <b>4</b> | 0.477             | <b>7</b>  |
| <i>L. spp</i> + <i>B. spp</i>                 | 0.563                | <b>11</b> | 0.595                                   | <b>9</b>  | 0.488                                        | <b>8</b>  | 0.723                          | <b>2</b>  | 0.541                       | <b>7</b>  | 0.573                         | <b>5</b>  | -                    | -        | 0.742             | <b>2</b>  |
| <i>L. spp</i> + <i>B. spp</i> + <i>S. spp</i> | 0.718                | <b>4</b>  | 0.792                                   | <b>3</b>  | 0.634                                        | <b>4</b>  | 0.536                          | <b>7</b>  | 0.557                       | <b>5</b>  | 0.574                         | <b>4</b>  | 0.569                | <b>3</b> | 0.413             | <b>8</b>  |

|                                                                     |       |           |       |           |       |           |       |           |       |           |       |           |       |           |       |           |
|---------------------------------------------------------------------|-------|-----------|-------|-----------|-------|-----------|-------|-----------|-------|-----------|-------|-----------|-------|-----------|-------|-----------|
| <i>L. spp</i> + <i>S. spp</i>                                       | 0.497 | <b>13</b> | -     | -         | 0.393 | <b>10</b> | 0.612 | <b>5</b>  | -     | -         | -     | -         | -     | -         | -     | -         |
| <i>B. spp</i> + <i>S. spp</i>                                       | 0.227 | <b>18</b> | 0.193 | <b>15</b> | -     | -         | -     | -         | -     | -         | -     | -         | -     | -         | -     | -         |
| <i>Bacillus spp</i> + <i>E. spp</i> + <i>C. spp</i> (               | 0.666 | <b>6</b>  | 0.742 | <b>4</b>  | 0.544 | <b>6</b>  | -     | -         | 0.448 | <b>8</b>  | 0.878 | <b>1</b>  | 0.844 | <b>2</b>  | 0.411 | <b>9</b>  |
| <i>L. spp</i> + <i>B. spp</i> + <i>E. spp</i>                       | 0.795 | <b>2</b>  | -     | -         | 0.710 | <b>3</b>  | 0.740 | <b>1</b>  | 0.590 | <b>4</b>  | 0.751 | <b>3</b>  | -     | -         | -     | -         |
| <i>L. spp</i> + <i>B. spp</i> + <i>S. spp</i> + <i>P. spp</i>       | 0.633 | <b>9</b>  | 0.718 | <b>6</b>  | -     | -         | -     | -         | -     | -         | -     | -         | 0.919 | <b>1</b>  | 0.621 | <b>4</b>  |
| <i>L. spp</i> + <i>S. spp</i> + <i>C. spp</i> + <i>Bacillus spp</i> | 0.642 | <b>7</b>  | 0.733 | <b>5</b>  | -     | -         | -     | -         | -     | -         | 0.571 | <b>6</b>  | -     | -         | -     | -         |
| Control (placebo/no treatment)                                      | 0.156 | <b>21</b> | 0.134 | <b>17</b> | 0.07  | <b>13</b> | 0.153 | <b>12</b> | 0.197 | <b>12</b> | 0.122 | <b>13</b> | 0.194 | <b>10</b> | 0.263 | <b>11</b> |
